# Supplementary material for: Association of unsweetened and sweetened cereal consumption with all-cause and cause-specific mortality: a large prospective population-based cohort study
Source: Royal Society of Chemistry journal article supplement (doi:10.1039/d4fo03761h), 2024-01-01
Supplement: d4fo03761h1.pdf [file d4fo03761h1.pdf]

## Supplementary information

### Association of unsweetened and sweetened cereals consumption with all-cause and cause-specific mortality: a large prospective population-based cohort study

#### Contents

|                                                                                                                                                                                                          |    |
|----------------------------------------------------------------------------------------------------------------------------------------------------------------------------------------------------------|----|
| Supplemental Table 1. Classification of cereal consumers by sweeteners.....                                                                                                                              | 4  |
| Supplemental Table 2. Baseline characteristics between participants included and excluded in the UKB cohort before imputation.....                                                                       | 5  |
| Supplemental Table 3. Scoring for the modified Alternative Healthy Eating Index.....                                                                                                                     | 7  |
| Supplemental Table 4. The eight items included in the modified Alternative Healthy Eating Index (AHEI)...                                                                                                | 13 |
| Supplemental Table 5. Information about all variables involved in this study.....                                                                                                                        | 14 |
| Supplemental Table 6. Definitions of sleep behaviors.....                                                                                                                                                | 16 |
| Supplemental Table 7. Definition and list of long-term conditions in UK Biobank.....                                                                                                                     | 18 |
| Supplemental Table 8. Definition of refined grains.....                                                                                                                                                  | 22 |
| Supplemental Table 9. Detailed information on missing covariates.....                                                                                                                                    | 23 |
| Supplemental Table 10. Mean (SD) consumption of sugar and artificially sweetener added to cereal across multiple 24-hour dietary recalls.....                                                            | 24 |
| Supplemental Table 11. Associations of cereal consumption with all-cause and cause-specific mortality after excluding participants with missing covariates.....                                          | 26 |
| Supplemental Table 12. Associations of cereal consumption with all-cause and cause-specific mortality after excluding participants who had an outcome event during the first two years of follow-up..... | 28 |
| Supplemental Table 13. Associations of cereal consumption with all-cause and cause-specific mortality after excluding participants who were not on a typical diet yesterday.....                         | 30 |
| Supplemental Table 14. Associations of cereal consumption with all-cause and cause-specific mortality after removing sugar added to cereal from total sugar and total energy.....                        | 32 |
| Supplemental Table 15. Associations of cereal consumption with all-cause and cause-specific mortality after excluding participants who ate cereal last year but not the day before.....                  | 34 |
| Supplemental Table 16. Associations of breakfast cereal consumption with all-cause and specific-cause mortality.....                                                                                     | 36 |

|                                                                                                                                                                             |    |
|-----------------------------------------------------------------------------------------------------------------------------------------------------------------------------|----|
| Supplemental Figure 1. Histogram of total cereal intake. The dashed blue line is the 99th percentile of cereal intake.....                                                  | 38 |
| Supplemental Figure 2. Flowchart of four cereal consumer classifications. ....                                                                                              | 39 |
| Supplemental Figure 3. The amount of added sugar or artificial sweetener per bowl of cereal for sugar-sweetened consumers (A) and artificially sweetened consumers (B)..... | 40 |
| Supplemental Figure 4. Age-stratified analysis of the association between cereal consumption and all-cause mortality in the multivariable model.....                        | 42 |
| Supplemental Figure 5. Sex-stratified analysis of the association between cereal consumption and all-cause mortality in the multivariable model.....                        | 44 |
| Supplemental Figure 6. BMI-stratified analysis of the association between cereal consumption and all-cause mortality in the multivariable model.....                        | 46 |
| Supplemental Figure 7. TDI-stratified analysis of the association between cereal consumption and all-cause mortality in the multivariable model.....                        | 48 |
| Supplemental Figure 8. Associations of cereal consumption with all-cause mortality by subgroups.....                                                                        | 50 |
| Supplemental Figure 9. Sensitivity analysis of the association of cereal consumption with cancer-specific mortality.....                                                    | 52 |
| Supplemental Figure 10. Sensitivity analysis of the association of cereal consumption with CVD-specific mortality.....                                                      | 54 |
| Supplemental Figure 11. Flowchart of breakfast cereal consumption and all-cause, special-cause deaths. ....                                                                 | 56 |
| Supplemental Figure 12. Dose–response associations of Breakfast cereal consumption with all-cause, cancer, and CVD mortality.....                                           | 58 |

**Supplemental Table 1. Classification of cereal consumers by sweeteners.**

| Categories of cereal consumers                         | n      | %     |
|--------------------------------------------------------|--------|-------|
| Non-consumers                                          | 54228  | 26.6% |
| Sole consumers                                         |        |       |
| Unsweetened                                            | 104432 | 51.3% |
| Sugar-sweetened                                        | 24859  | 12.2% |
| Artificially sweetened                                 | 4488   | 2.2%  |
| Overlapped consumers of sweeteners                     |        |       |
| Unsweetened & Sugar-sweetened                          | 12775  | 6.3%  |
| Unsweetened & Artificially sweetened                   | 1381   | 0.7%  |
| Sugar-sweetened & Artificially sweetened               | 1085   | 0.5%  |
| Unsweetened & Sugar-sweetened & Artificially sweetened | 248    | 0.1%  |
| Total                                                  | 203496 | 100%  |

Note: As shown in the workflow, a total of 210,947 individuals completed at least one 24-hour dietary recall questionnaire. We excluded participants who were lost during follow-up (n = 569), participants whose diets were not credible (n = 3,160), and participants in the top 1% of the cereal intake distribution (n = 3,722), leaving 203,496 participants with reliable cereal intake. We then further classified consumers based on whether additional sugar or artificially sweeteners were added to the cereal. In detail, the type and number of cross-consuming sweeteners are shown here.

**Supplemental Table 2. Baseline characteristics between participants included and excluded in the UKB cohort before imputation.**

| Characteristic                                                | Included         | Excluded (with 24-hour dietary recall) | Excluded (without 24-hour dietary recall) | p-values |
|---------------------------------------------------------------|------------------|----------------------------------------|-------------------------------------------|----------|
| Participants, n (%)                                           | 186419 (37.1)    | 24528 (4.9)                            | 291422 (58.0)                             | -        |
| Median follow-up, years (IQR)                                 | 13.6 (13.0-14.4) | 13.5 (13.0-14.3)                       | 14.3 (13.5-14.8)                          | <0.001   |
| Mean age (SD), y                                              | 56.0 (8.0)       | 56.4 (7.9)                             | 56.9 (8.2)                                | <0.001   |
| Male, n (%)                                                   | 83765 (44.9)     | 10980 (44.8)                           | 134323 (46.1)                             | <0.001   |
| BMI (kg/m <sup>2</sup> ), n (%)                               |                  |                                        |                                           | <0.001   |
| < 25                                                          | 69130 (37.2)     | 9361 (38.4)                            | 86487 (29.9)                              |          |
| ≥ 25 & < 30                                                   | 77301 (41.6)     | 10024 (41.2)                           | 124737 (43.2)                             |          |
| ≥ 30                                                          | 39565 (21.3)     | 4971 (20.4)                            | 77686 (26.9)                              |          |
| Mean Basal metabolic rate (SD), KJ                            | 6605.9 (1353.6)  | 6615.2 (1357.7)                        | 6622.9 (1371.7)                           | <0.001   |
| Ethnicity, n (%)                                              |                  |                                        |                                           | <0.001   |
| White                                                         | 177944 (95.7)    | 23284 (96.0)                           | 271345 (93.8)                             |          |
| Other                                                         | 7972 (4.3)       | 975 (4.0)                              | 18071 (6.2)                               |          |
| Mean Townsend deprivation index (SD)                          | -1.6 (2.9)       | -1.6 (2.9)                             | -1.1 (3.2)                                | <0.001   |
| Household income, n (%), £                                    |                  |                                        |                                           | <0.001   |
| < 18,000                                                      | 25864 (15.4)     | 3672 (17.3)                            | 67640 (28.6)                              |          |
| 18,000-30,999                                                 | 40603 (24.2)     | 5384 (25.4)                            | 62156 (26.3)                              |          |
| 31,000-51,999                                                 | 47715 (28.4)     | 6098 (28.7)                            | 56933 (24.1)                              |          |
| 52,000-100,000                                                | 41279 (24.6)     | 4721 (22.3)                            | 40243 (17.0)                              |          |
| > 100,000                                                     | 12270 (7.3)      | 1336 (6.3)                             | 9317 (3.9)                                |          |
| Education                                                     |                  |                                        |                                           | <0.001   |
| Degree                                                        | 79443 (42.8)     | 10281 (42.6)                           | 71380 (25.3)                              |          |
| No degree                                                     | 106307 (57.2)    | 13872 (57.4)                           | 210954 (74.7)                             |          |
| Smoking status, n (%)                                         |                  |                                        |                                           | <0.001   |
| Never                                                         | 105092 (56.5)    | 13889 (57.3)                           | 154468 (53.4)                             |          |
| Former                                                        | 66063 (35.5)     | 8791 (36.2)                            | 98155 (34.0)                              |          |
| Current                                                       | 14969 (8.0)      | 1577 (6.5)                             | 36415 (12.6)                              |          |
| Mean pack-years of smoking for current or former smokers (SD) | 20.9 (17.3)      | 20.1 (16.9)                            | 25.1 (19.6)                               | <0.001   |
| Physical activity level, n (%)                                |                  |                                        |                                           | <0.001   |
| Low                                                           | 29427 (18.5)     | 3501 (17.4)                            | 43262 (19.4)                              |          |
| Moderate                                                      | 67269 (42.4)     | 8336 (41.5)                            | 88382 (39.5)                              |          |
| High                                                          | 61944 (39.0)     | 8261 (41.1)                            | 91891 (41.1)                              |          |
| Vitamin use, n (%)                                            | 60569 (32.6)     | 8237 (34.0)                            | 89061 (31.3)                              | <0.001   |
| Minerals and other dietary supplements use, n (%)             | 81184 (43.6)     | 11454 (47.1)                           | 121103 (42.4)                             | <0.001   |
| NSAIDs use, n (%)                                             | 68226 (36.9)     | 9028 (37.5)                            | 121661 (43.1)                             | <0.001   |
| Healthy sleep pattern, n (%)                                  | 94405 (60.2)     | 12108 (62.0)                           | 132100 (56.4)                             | <0.001   |
| Family history of CVD, n (%)                                  | 105259 (57.2)    | 13622 (57.9)                           | 164021 (57.7)                             | 0.003    |
| Family history of cancer, n (%)                               | 65339 (35.5)     | 8345 (35.4)                            | 102007 (35.9)                             | 0.022    |
| Number of long-term conditions, n (%)                         |                  |                                        |                                           | <0.001   |
| None                                                          | 53765 (28.8)     | 6877 (28.1)                            | 72278 (24.9)                              |          |
| One                                                           | 59768 (32.1)     | 7801 (31.9)                            | 87322 (30.0)                              |          |
| Two                                                           | 39724 (21.3)     | 5242 (21.4)                            | 64668 (22.2)                              |          |
| Three                                                         | 19968 (10.7)     | 2735 (11.2)                            | 36684 (12.6)                              |          |
| Four                                                          | 8414 (4.5)       | 1137 (4.6)                             | 17567 (6.0)                               |          |
| Five and more                                                 | 4780 (2.6)       | 676 (2.8)                              | 12227 (4.2)                               |          |
| Mean intake (SD)                                              |                  |                                        |                                           |          |
| Energy, kcal/d                                                | 2077.0 (589.1)   | 2395.4 (975.0)                         | -                                         | <0.001   |
| Total sugar, g/d                                              | 118.1 (47.9)     | 144.1 (75.4)                           | -                                         | <0.001   |
| Coffee, drinks/d                                              | 2.0 (1.8)        | 2.2 (1.8)                              | -                                         | <0.001   |
| Starchy food, servings/d                                      | 0.1 (0.3)        | 0.1 (0.4)                              | -                                         | <0.001   |
| Refined grains, servings/d                                    | 0.9 (1.1)        | 1.3 (1.3)                              | -                                         | <0.001   |
| Snacks, servings/d                                            | 0.6 (1.0)        | 0.8 (1.2)                              | -                                         | <0.001   |
| Pizza, servings/d                                             | 0.1 (0.6)        | 0.2 (0.7)                              | -                                         | <0.001   |
| Cereal on average in past year, bowls /d                      | 0.6 (0.4)        | 0.8 (0.3)                              | 0.6 (0.4)                                 | <0.001   |
| Cereal, bowls /d                                              | 0.7 (0.6)        | 1.7 (0.9)                              | -                                         | <0.001   |
| Containing dried fruit                                        | 0.4 (0.6)        | 1.0 (1.1)                              | -                                         | <0.001   |
| No dried fruit                                                | 0.4 (0.6)        | 0.7 (1.0)                              | -                                         | <0.001   |
| Type of sweetener added to cereal, teaspoons/bowl             |                  |                                        |                                           |          |
| Sugar                                                         | 0.1 (0.4)        | 0.7 (0.7)                              | -                                         | <0.001   |
| Artificial sweetener                                          | 0.0 (0.2)        | 0.1 (0.4)                              | -                                         | <0.001   |
| Mean Alternative healthy eating index (AHEI, SD) *            | 33.3 (11.8)      | 35.8 (11.2)                            | -                                         | <0.001   |

|                                             |           |           |           |        |
|---------------------------------------------|-----------|-----------|-----------|--------|
| Mean completed 24-h dietary recalls (SD), n | 2.1 (1.1) | 3.0 (1.1) | 0.0 (0.0) | <0.001 |
|---------------------------------------------|-----------|-----------|-----------|--------|

Note: Nonparametric tests were used for continuous variables and chi-square tests were used for categorical variables. The statistical tests were performed for each variable between the three groups. \* AHEI: The modified Alternative Healthy Eating Index is a combination of eight dietary indicators, including vegetables, fruit, sugar-sweetened beverages and fruit juice, nuts and legumes, red or processed meat, Long-chain (n-3) fats (EPA + DHA), PUFA, % of energy, and alcohol (Supplemental Table 3-4). The scores were summed producing an overall score ranging from 0 to 80.

Abbreviations: IQR, interquartile range; BMI: body mass index; SD: standard deviation; NSAIDs, Nonsteroidal anti-inflammatory drugs; CVD: cardiovascular disease; AHEI, Alternative Healthy Eating Index.

**Supplemental Table 3. Scoring for the modified Alternative Healthy Eating Index.**

| Diet component | UKB variable | label                          | Coding (standard servings per day) | Scoring                        |                                 |
|----------------|--------------|--------------------------------|------------------------------------|--------------------------------|---------------------------------|
|                |              |                                |                                    | Criteria for minimum score (0) | Criteria for maximum score (10) |
| Vegetable      | 103990       | Vegetable consumers            | 0/1, N/Y                           |                                |                                 |
|                | 104060       | Mixed vegetable                | 444/555/1/2/300, ¼ / ½ /1/2/3+     |                                |                                 |
|                | 104070       | Vegetable pieces               | 444/555/1/2/300, ¼ / ½ /1/2/3+     |                                |                                 |
|                | 104080       | Coleslaw                       | 444/555/1/2/300, ¼ / ½ /1/2/3+     |                                |                                 |
|                | 104090       | Side salad                     | 444/555/1/2/300, ¼ / ½ /1/2/3+     |                                |                                 |
|                | 104120       | Green bean                     | 444/555/1/2/300, ¼ / ½ /1/2/3+     |                                |                                 |
|                | 104130       | Beetroot                       | 444/555/1/2/300, ¼ / ½ /1/2/3+     |                                |                                 |
|                | 104140       | Broccoli                       | 444/555/1/2/300, ¼ / ½ /1/2/3+     |                                |                                 |
|                | 104150       | Butternut squash               | 444/555/1/2/300, ¼ / ½ /1/2/3+     |                                |                                 |
|                | 104160       | Cabbage/kale                   | 444/555/1/2/300, ¼ / ½ /1/2/3+     |                                |                                 |
|                | 104170       | Carrot                         | 444/555/1/2/300, ¼ / ½ /1/2/3+     |                                |                                 |
|                | 104180       | Cauliflower                    | 444/555/1/2/300, ¼ / ½ /1/2/3+     |                                |                                 |
|                | 104190       | Celery                         | 444/555/1/2/300, ¼ / ½ /1/2/3+     |                                |                                 |
|                | 104200       | Courgette                      | 444/555/1/2/300, ¼ / ½ /1/2/3+     |                                |                                 |
|                | 104210       | Cucumber                       | 444/555/1/2/300, ¼ / ½ /1/2/3+     |                                |                                 |
|                | 104220       | Garlic                         | 444/555/1/2/300, ¼ / ½ /1/2/3+     |                                |                                 |
|                | 104230       | Leek                           | 444/555/1/2/300, ¼ / ½ /1/2/3+     |                                |                                 |
|                | 104240       | Lettuce                        | 444/555/1/2/300, ¼ / ½ /1/2/3+     |                                |                                 |
|                | 104250       | Mushroom                       | 444/555/1/2/300, ¼ / ½ /1/2/3+     |                                |                                 |
|                | 104260       | Onion                          | 444/555/1/2/300, ¼ / ½ /1/2/3+     |                                |                                 |
|                | 104270       | Parsnip                        | 444/555/1/2/300, ¼ / ½ /1/2/3+     |                                |                                 |
|                | 104280       | Pea                            | 444/555/1/2/300, ¼ / ½ /1/2/3+     |                                |                                 |
|                | 104290       | Sweet pepper                   | 444/555/1/2/300, ¼ / ½ /1/2/3+     |                                |                                 |
| 104300         | Spinach      | 444/555/1/2/300, ¼ / ½ /1/2/3+ |                                    |                                |                                 |
| 104310         | Sprouts      | 444/555/1/2/300, ¼ / ½ /1/2/3+ |                                    |                                |                                 |
| 104320         | Sweetcorn    | 444/555/1/2/300, ¼ / ½ /1/2/3+ |                                    |                                |                                 |

|                   |                                                                                                                                                                                                                                                                                                                                                        |                                  |                                |               |                |
|-------------------|--------------------------------------------------------------------------------------------------------------------------------------------------------------------------------------------------------------------------------------------------------------------------------------------------------------------------------------------------------|----------------------------------|--------------------------------|---------------|----------------|
|                   | 104330                                                                                                                                                                                                                                                                                                                                                 | Sweet potato                     | 444/555/1/2/300, ¼ / ½ /1/2/3+ |               |                |
|                   | 104340                                                                                                                                                                                                                                                                                                                                                 | Fresh tomato                     | 444/555/1/2/300, ¼ / ½ /1/2/3+ |               |                |
|                   | 104350                                                                                                                                                                                                                                                                                                                                                 | Tinned tomato                    | 444/555/1/2/300, ¼ / ½ /1/2/3+ |               |                |
|                   | 104360                                                                                                                                                                                                                                                                                                                                                 | Turnip/swede                     | 444/555/1/2/300, ¼ / ½ /1/2/3+ |               |                |
|                   | 104370                                                                                                                                                                                                                                                                                                                                                 | Watercress                       | 444/555/1/2/300, ¼ / ½ /1/2/3+ |               |                |
|                   | 104380                                                                                                                                                                                                                                                                                                                                                 | Other vegetables                 | 444/555/1/2/300, ¼ / ½ /1/2/3+ |               |                |
|                   |                                                                                                                                                                                                                                                                                                                                                        |                                  |                                |               |                |
|                   | 102520                                                                                                                                                                                                                                                                                                                                                 | Soup consumers                   | 0/1, N/Y                       |               |                |
|                   | 102540                                                                                                                                                                                                                                                                                                                                                 | Canned soup intake (bowls/d)     | 555/1/2/3/400, ½ /1/2/3/4+     |               |                |
|                   | 102620                                                                                                                                                                                                                                                                                                                                                 | Homemade soup intake             | 555/1/2/3/400, ½ /1/2/3/4+     |               |                |
|                   | 20108                                                                                                                                                                                                                                                                                                                                                  | Ingredients in canned soup       | 5, vegetables                  |               |                |
|                   | 20109                                                                                                                                                                                                                                                                                                                                                  | Ingredients in homemade soup     | 5, vegetables                  |               |                |
|                   |                                                                                                                                                                                                                                                                                                                                                        |                                  |                                |               |                |
|                   | 103310                                                                                                                                                                                                                                                                                                                                                 | Spreads/sauces consumers         | 0/1, N/Y                       |               |                |
|                   | 20088                                                                                                                                                                                                                                                                                                                                                  | Types of spreads/sauces consumed |                                |               |                |
|                   |                                                                                                                                                                                                                                                                                                                                                        | Tomato sauce                     | 346 (max 1 serving)            |               |                |
|                   |                                                                                                                                                                                                                                                                                                                                                        | *1 veg soup= 0.25 veg serving    |                                |               |                |
|                   | Since 20108, and 20109 are not exclusive, we derived a “servings of vegetable soup” variable weighted by response.<br>Since 20088 is not exclusive, we derived a “servings of vegetable sauce” variable weighted by response (assumed max 1 serving).<br>Used mean intake across diet records for each item then summed item means for daily servings. |                                  |                                | 0 serving/day | ≥5 serving/day |
| Fruit (not juice) | 104400                                                                                                                                                                                                                                                                                                                                                 | Fruit consumers                  | 0/1, N/Y                       |               |                |
|                   | 104410                                                                                                                                                                                                                                                                                                                                                 | Stewed fruit                     | 555/1/2/3/400, ½ /1/2/3/4+     |               |                |
|                   | 104420                                                                                                                                                                                                                                                                                                                                                 | Prune                            | 555/1/2/3/400, ½ /1/2/3/4+     |               |                |
|                   | 104430                                                                                                                                                                                                                                                                                                                                                 | Dried fruit                      | 555/1/2/3/400, ½ /1/2/3/4+     |               |                |
|                   | 104440                                                                                                                                                                                                                                                                                                                                                 | Mixed fruit                      | 555/1/2/3/400, ½ /1/2/3/4+     |               |                |
|                   | 104450                                                                                                                                                                                                                                                                                                                                                 | Apple                            | 555/1/2/3/400, ½ /1/2/3/4+     |               |                |
|                   | 104460                                                                                                                                                                                                                                                                                                                                                 | Banana                           | 555/1/2/3/400, ½ /1/2/3/4+     |               |                |
|                   | 104470                                                                                                                                                                                                                                                                                                                                                 | Berry                            | 555/1/2/3/400, ½ /1/2/3/4+     |               |                |
|                   | 104480                                                                                                                                                                                                                                                                                                                                                 | Cherry                           | 555/1/2/3/400, ½ /1/2/3/4+     |               |                |
|                   | 104490                                                                                                                                                                                                                                                                                                                                                 | Grapefruit                       | 555/1/2/3/400, ½ /1/2/3/4+     |               |                |

|                                         |                                                                                               |                                                                   |                                    |                |                |
|-----------------------------------------|-----------------------------------------------------------------------------------------------|-------------------------------------------------------------------|------------------------------------|----------------|----------------|
|                                         | 104500                                                                                        | Grape                                                             | 555/1/2/3/400, ½ /1/2/3/4+         |                |                |
|                                         | 104510                                                                                        | Mango                                                             | 555/1/2/3/400, ½ /1/2/3/4+         |                |                |
|                                         | 104520                                                                                        | Melon intake                                                      | 555/1/2/3/400, ½ /1/2/3/4+         |                |                |
|                                         | 104530                                                                                        | Orange intake                                                     | 555/1/2/3/400, ½ /1/2/3/4+         |                |                |
|                                         | 104540                                                                                        | Satsuma intake                                                    | 555/1/2/3/400, ½ /1/2/3/4+         |                |                |
|                                         | 104550                                                                                        | Peach/nectarine intake                                            | 555/1/2/3/400, ½ /1/2/3/4+         |                |                |
|                                         | 104560                                                                                        | Pear intake                                                       | 555/1/2/3/400, ½ /1/2/3/4+         |                |                |
|                                         | 104570                                                                                        | Pineapple intake                                                  | 555/1/2/3/400, ½ /1/2/3/4+         |                |                |
|                                         | 104580                                                                                        | Plum intake                                                       | 555/1/2/3/400, ½ /1/2/3/4+         |                |                |
|                                         | 104590                                                                                        | Other fruit intake                                                | 555/1/2/3/400, ½ /1/2/3/4+         |                |                |
|                                         |                                                                                               |                                                                   |                                    |                |                |
|                                         | 103990                                                                                        | Vegetable consumers                                               | 0/1, N/Y                           |                |                |
|                                         | 104100                                                                                        | Avocado intake (servings/d)                                       | 444/555/1/2/300, ¼ / ½ /1/2/3+     |                |                |
|                                         | Used mean intake across diet records for each item then summed item means for daily servings. |                                                                   |                                    | 0 serving/day  | ≥4 serving/day |
| Sugar sweetened beverages + fruit juice | 100170                                                                                        | Fizzy drink                                                       | 555/1/2/3/4/5/600, ½ /1/2/3/4/5/6+ |                |                |
|                                         | 100180                                                                                        | Squash                                                            | 555/1/2/3/4/5/600, ½ /1/2/3/4/5/6+ |                |                |
|                                         | 100190                                                                                        | Orange juice                                                      | 555/1/2/3/4/5/600, ½ /1/2/3/4/5/6+ |                |                |
|                                         | 100200                                                                                        | Grapefruit juice                                                  | 555/1/2/3/4/5/600, ½ /1/2/3/4/5/6+ |                |                |
|                                         | 100210                                                                                        | Pure fruit/vegetable juice<br>(1 serving=1/2 fruit juice serving) | 555/1/2/3/4/5/600, ½ /1/2/3/4/5/6+ |                |                |
|                                         | 100220                                                                                        | Fruit smoothie                                                    | 555/1/2/3/4/5/600, ½ /1/2/3/4/5/6+ |                |                |
|                                         |                                                                                               |                                                                   |                                    |                |                |
|                                         | 100510                                                                                        | Other non-alcoholic drinks                                        | 0/1, N/Y                           |                |                |
|                                         | 100530                                                                                        | Flavoured milk                                                    | 555/1/2/3/4/5/600, ½ /1/2/3/4/5/6+ |                |                |
|                                         | 100550                                                                                        | Hot chocolate                                                     | 555/1/2/3/4/5/600, ½ /1/2/3/4/5/6+ |                |                |
|                                         | Used mean intake across diet records for each item then summed item means for daily intake.   |                                                                   |                                    | ≥1 serving/day | 0 serving/day  |
| Nut& Legumes                            | 103990                                                                                        | Vegetable consumers                                               | 0/1, N/Y                           |                |                |
|                                         | 104000                                                                                        | Baked bean                                                        | 444/555/1/2/300, ¼ / ½ /1/2/3+     |                |                |
|                                         | 104010                                                                                        | Pulses                                                            | 444/555/1/2/300, ¼ / ½ /1/2/3+     |                |                |
|                                         | 104110                                                                                        | Broad bean                                                        | 444/555/1/2/300, ¼ / ½ /1/2/3+     |                |                |



|                     |                                                                                                                                                                                                                                                                                                                                                  |                                                                 |                                |               |                |
|---------------------|--------------------------------------------------------------------------------------------------------------------------------------------------------------------------------------------------------------------------------------------------------------------------------------------------------------------------------------------------|-----------------------------------------------------------------|--------------------------------|---------------|----------------|
|                     |                                                                                                                                                                                                                                                                                                                                                  |                                                                 |                                |               |                |
|                     | 102520                                                                                                                                                                                                                                                                                                                                           | Soup consumer                                                   | 0/1, N/Y                       |               |                |
|                     | 102540                                                                                                                                                                                                                                                                                                                                           | Canned                                                          | 555/1/2/3/400, ½ /1/2/3/4+     |               |                |
|                     | 102620                                                                                                                                                                                                                                                                                                                                           | Homemade                                                        | 555/1/2/3/400, ½ /1/2/3/4+     |               |                |
|                     | 20108                                                                                                                                                                                                                                                                                                                                            | Ingredients in canned soup                                      | 4, pulses                      |               |                |
|                     | 20109                                                                                                                                                                                                                                                                                                                                            | Ingredients in homemade soup<br>*1 bean soup= 0.25 bean serving | 4, pulses                      |               |                |
|                     |                                                                                                                                                                                                                                                                                                                                                  |                                                                 |                                |               |                |
|                     | 103310                                                                                                                                                                                                                                                                                                                                           | Spreads/sauces consumers                                        | 0/1, N/Y                       |               |                |
|                     | 20088                                                                                                                                                                                                                                                                                                                                            | Types of spreads/sauces consumed                                | Peanut butter/Hummus, 334/336  |               |                |
|                     |                                                                                                                                                                                                                                                                                                                                                  |                                                                 |                                |               |                |
|                     | 102400                                                                                                                                                                                                                                                                                                                                           | Savoury snack consumers                                         | 0/1, N/Y                       |               |                |
|                     | 102410                                                                                                                                                                                                                                                                                                                                           | Salted peanuts                                                  | 555/1/2/300, ½ /1/2/3+         |               |                |
|                     | 102420                                                                                                                                                                                                                                                                                                                                           | Unsalted peanuts                                                | 555/1/2/300, ½ /1/2/3+         |               |                |
|                     | 102430                                                                                                                                                                                                                                                                                                                                           | Salted nuts                                                     | 555/1/2/300, ½ /1/2/3+         |               |                |
|                     | 102440                                                                                                                                                                                                                                                                                                                                           | Unsalted nuts                                                   | 555/1/2/300, ½ /1/2/3+         |               |                |
|                     | 102450                                                                                                                                                                                                                                                                                                                                           | Seeds                                                           | 555/1/2/300, ½ /1/2/3+         |               |                |
|                     |                                                                                                                                                                                                                                                                                                                                                  |                                                                 |                                |               |                |
|                     | 103250                                                                                                                                                                                                                                                                                                                                           | Vegetarian alternatives                                         | 0/1, N/Y                       |               |                |
|                     | 103260                                                                                                                                                                                                                                                                                                                                           | Vegetarian sausages/burgers                                     | 555/1/2/3/400, ½ /1/2/3/4+     |               |                |
|                     | 103270                                                                                                                                                                                                                                                                                                                                           | Tofu                                                            | 555/1/2/3/400, ½ /1/2/3/4+     |               |                |
|                     | 103280                                                                                                                                                                                                                                                                                                                                           | Quorn                                                           | 555/1/2/3/400, ½ /1/2/3/4+     |               |                |
|                     | 103290                                                                                                                                                                                                                                                                                                                                           | Other vegetarian alternative                                    | 555/1/2/3/400, ½ /1/2/3/4+     |               |                |
|                     | Since 20108, and 20109 are not exclusive, we derived a “servings of legume soup” variable weighted by response.<br>Since 20088 is not exclusive, we derived a “servings of legume sauce” variable weighted by response (assumed max 1 serving).<br>Used mean intake across diet records for each item then summed item means for daily servings. |                                                                 |                                | 0 serving/day | ≥1 serving/day |
| Red meat & products | 103000                                                                                                                                                                                                                                                                                                                                           | Meat consumers                                                  | 0/1, N/Y                       |               |                |
|                     | 103010                                                                                                                                                                                                                                                                                                                                           | Sausage                                                         | 555/1/2/3/4/500, ½ /1/2/3/4/5+ |               |                |
|                     | 103020                                                                                                                                                                                                                                                                                                                                           | Beef                                                            | 555/1/2/3/4/500, ½ /1/2/3/4/5+ |               |                |
|                     | 103030                                                                                                                                                                                                                                                                                                                                           | Pork                                                            | 555/1/2/3/4/500, ½ /1/2/3/4/5+ |               |                |

|                                        |                                                                                                                                                                                                          |                        |                                |                                          |                                                |
|----------------------------------------|----------------------------------------------------------------------------------------------------------------------------------------------------------------------------------------------------------|------------------------|--------------------------------|------------------------------------------|------------------------------------------------|
|                                        | 103040                                                                                                                                                                                                   | Lamb                   | 555/1/2/3/4/500, ½ /1/2/3/4/5+ |                                          |                                                |
|                                        | 103070                                                                                                                                                                                                   | Bacon                  | 555/1/2/3/4/500, ½ /1/2/3/4/5+ |                                          |                                                |
|                                        | 103080                                                                                                                                                                                                   | Ham                    | 555/1/2/3/4/500, ½ /1/2/3/4/5+ |                                          |                                                |
|                                        | Used mean intake across diet records for each item then summed item means for daily servings.                                                                                                            |                        |                                | ≥1.5 serving/day                         | 0 serving/day                                  |
| Long chain (n-3) fats (EPA +DHA), mg/d | 103140                                                                                                                                                                                                   | Fish consumer          | 0/1, N/Y                       |                                          |                                                |
|                                        | 103160                                                                                                                                                                                                   | Oily fish (servings/d) | 555/1/2/3/400, ½ /1/2/3/4+     |                                          |                                                |
|                                        | The cutoff for optimal intake (250 mg/d) is ~2 4-oz servings of fish /wk, which is consistent with current guidelines (1 oz = 28.35 g). We applied the cutoff for optimal intake as 2 servings per week. |                        |                                | 0 serving/day                            | ≥2 serving/week                                |
| PUFA, % energy                         | 100007                                                                                                                                                                                                   | Polyunsaturated fat    | g/day                          |                                          |                                                |
|                                        | 100002                                                                                                                                                                                                   | Energy                 | KJ/day                         |                                          |                                                |
|                                        | Converted g to calories (1 g ≈9 cal) and derived % of total energy (cal=kj*0.2388458966275). Used mean intake across diet records.                                                                       |                        |                                | ≤2 %                                     | ≥10 %                                          |
| Alcohol, g/d                           | 100580                                                                                                                                                                                                   | Alcohol consumed       | 0/1, N/Y                       |                                          |                                                |
|                                        | 100022                                                                                                                                                                                                   | Alcohol                | g/d                            |                                          |                                                |
|                                        | Used mean intake across diet records.                                                                                                                                                                    |                        |                                | ≥2.5 g/day (Female)<br>≥3.5 g/day (Male) | 0.5-1.5 g/day (Female)<br>0.5-2.0 g/day (Male) |

Note: N: no; Y: yes.

**Supplemental Table 4. The eight items included in the modified Alternative Healthy Eating Index (AHEI).**

| Characteristic                                      | Total        | Non-consumers | Cereal Consumers |                 |                        | P value |
|-----------------------------------------------------|--------------|---------------|------------------|-----------------|------------------------|---------|
|                                                     |              |               | Unsweetened      | Sugar-Sweetened | Artificially Sweetened |         |
| Participants, n (%)                                 | 186419 (100) | 53681 (28.8)  | 103746 (55.7)    | 24575 (13.2)    | 4417 (2.4)             | -       |
| Mean Alternative healthy eating index (AHEI, SD) *  | 33.3 (11.8)  | 31.6 (11.9)   | 34.4 (11.7)      | 32.5 (11.7)     | 33.8 (11.5)            | <0.001  |
| Mean intake (SD)                                    |              |               |                  |                 |                        |         |
| Vegetables, servings/d                              | 4.4 (3.6)    | 3.9 (3.6)     | 4.7 (3.6)        | 4.1 (3.4)       | 4.5 (3.8)              | <0.001  |
| Fruit, servings/d                                   | 3.4 (2.7)    | 2.7 (2.6)     | 3.8 (2.7)        | 3.1 (2.5)       | 3.6 (2.9)              | <0.001  |
| Sugar-sweetened beverages and fruit juice, drinks/d | 1.1 (1.2)    | 1.0 (1.2)     | 1.1 (1.2)        | 1.1 (1.2)       | 0.9 (1.2)              | <0.001  |
| Nuts and legumes, servings/d                        | 0.6 (1.0)    | 0.6 (0.9)     | 0.7 (1.0)        | 0.6 (0.9)       | 0.5 (0.9)              | <0.001  |
| Red or processed meat, servings/d                   | 1.5 (1.7)    | 1.5 (1.7)     | 1.5 (1.6)        | 1.4 (1.6)       | 1.5 (1.7)              | 0.001   |
| Long-chain (n-3) fats (EPA + DHA), servings/d       | 0.2 (0.4)    | 0.2 (0.4)     | 0.2 (0.4)        | 0.2 (0.4)       | 0.2 (0.4)              | <0.001  |
| PUFA, % of energy/d                                 | 0.1 (0.0)    | 0.1 (0.0)     | 0.1 (0.0)        | 0.1 (0.0)       | 0.1 (0.0)              | <0.001  |
| Alcohol, g/d                                        | 16.4 (21.5)  | 20.6 (25.8)   | 14.9 (19.1)      | 14.7 (19.8)     | 11.8 (19.1)            | <0.001  |

Note: Nonparametric tests were used for continuous variables and chi-square tests were used for categorical variables. The statistical tests were performed for each variable between the four cereal categories. \*The scores were summed producing an overall score ranging from 0 to 80.

**Supplemental Table 5. Information about all variables involved in this study.**

| <b>Variables</b>                       | <b>Field ID</b>                                        |
|----------------------------------------|--------------------------------------------------------|
| Exposure                               |                                                        |
| Unsweetened cereal intake              | Field ID 100760/100770/100800/100810/                  |
| Sugar-sweetened cereal intake          | 100820/100830/100840/100850/100860/                    |
| Artificially sweetened cereal intake   | 100880/100900/100910                                   |
| Inclusion and exclusion criteria       |                                                        |
| 24-hour dietary recall                 | Field ID 105010/105030/20077                           |
| Date lost to follow-up                 | Field ID 191                                           |
| Daily dietary data not credible        | Field ID 100026                                        |
| Covariates                             |                                                        |
| Age                                    | Field ID 21003                                         |
| SEX                                    | Field ID 21003                                         |
| BMI                                    | Field ID 21001                                         |
| Basal metabolic rate                   | Field ID 23105                                         |
| Ethnicity                              | Field ID 21000                                         |
| Townsend deprivation index             | Field ID 189                                           |
| Household income                       | Field ID 738                                           |
| Education level                        | Field ID 6138                                          |
| Smoking status                         | Field ID 20116                                         |
| Pack years of smoking                  | Field ID 20161                                         |
| Physical activity                      | Field ID 22032                                         |
| Cereal on average in past year         | Field ID 1458                                          |
| Vitamin and mineral supplements        | Field ID 6155                                          |
| Mineral and other dietary supplements  | Field ID 6179                                          |
| NSAIDs use                             | Field ID 6154                                          |
| Healthy sleep pattern                  | Details are shown in <b>Supplemental Table 6</b>       |
| Family history of CVD                  | Field ID 20107/20110/20111                             |
| Family history of cancer               | Field ID 20107/20110/20111                             |
| Number of long-term chronic conditions | Details are shown in <b>Supplemental Table 7</b>       |
| Typical diet yesterday                 | Field ID 100020                                        |
| Energy                                 | Field ID 100002                                        |
| Total sugar                            | Field ID 100008                                        |
| Coffee intake                          | Field ID 100250/100270/100290/<br>100300/100310/100330 |
| Starchy food (whole grains)            | Field ID 102700/102720/102740/102780                   |
| Refined grains                         | Details are shown in <b>Supplemental Table 8</b>       |
| Snacks                                 | Field ID 103990/104020/104320/<br>101300/101470        |
| Pizza                                  | Field ID 102000                                        |
| AHEI-2010 score                        | Details are shown in <b>Supplemental Table 3</b>       |
| Outcome                                |                                                        |

|                              |                           |
|------------------------------|---------------------------|
| All-cause death              | National Death Registries |
| Cancer or CVD-specific death | National Death Registries |

Note: BMI: body mass index; NSAIDs, Nonsteroidal anti-inflammatory drugs (Aspirin, Ibuprofen, and Paracetamol);  
CVD: cardiovascular disease; AHEI, Alternative Healthy Eating Index.

**Supplemental Table 6. Definitions of sleep behaviors.**

| Sleep phenotypes | Date field | UK Biobank Questionnaire                                                                                                                          | Response                                                                                                                                                                                                    | Scoring              |                      |
|------------------|------------|---------------------------------------------------------------------------------------------------------------------------------------------------|-------------------------------------------------------------------------------------------------------------------------------------------------------------------------------------------------------------|----------------------|----------------------|
|                  |            |                                                                                                                                                   |                                                                                                                                                                                                             | Criteria for 0 point | Criteria for 1 point |
| Sleep duration   | 1160       | Self-reported: "About how many hours sleep do you get in every 24 hours? (please include naps)"                                                   | Integer<br>-1 Do not know<br>-3 Prefer not to answer                                                                                                                                                        | <7 or >=9 hours/d    | 7-8 hours/d          |
| Chronotype       | 1180       | Self-reported: "Do you consider yourself to be?"                                                                                                  | 1 Definitely a 'morning' person<br>2 More a 'morning' than 'evening' person<br>3 More an 'evening' than a 'morning' person<br>4 Definitely an 'evening' person<br>-1 Do not know<br>-3 Prefer not to answer | 3 and 4              | 1 and 2              |
| Insomnia         | 1200       | Self-reported: "Do you have trouble falling asleep at night or do you wake up in the middle of the night?"                                        | 1 Never/rarely<br>2 Sometimes<br>3 Usually<br>-3 Prefer not to answer                                                                                                                                       | 3                    | 1 and 2              |
| Snoring          | 1210       | Self-reported: "Does your partner or a close relative or friend complain about your snoring?"                                                     | 1 Yes<br>2 No<br>-1 Do not know<br>-3 Prefer not to answer                                                                                                                                                  | 1                    | 2                    |
| Daytime dozing   | 1220       | Self-reported: "How likely are you to doze off or fall asleep during the daytime when you don't mean to? (e.g. when working, reading or driving)" | 0 Never/rarely<br>1 Sometimes<br>2 Often<br>3 All of the time<br>-1 Do not know<br>-3 Prefer not to answer                                                                                                  | 2 and 3              | 0 and 1              |

Note: Five distinct sleep traits were used to construct a healthy sleep score on a scale of 0-5, with higher scores indicating healthier sleep patterns.

**Supplemental Table 7. Definition and list of long-term conditions in UK Biobank.**

|           | <b>Morbidity grouping</b>   | <b>Conditions included</b>                 | <b>UKB Data field</b>                                      |
|-----------|-----------------------------|--------------------------------------------|------------------------------------------------------------|
| <b>1</b>  | Cancer                      | Cancer                                     | 2453 (1), 20001 (1001-1088, except 1060-1062, 1072, 99999) |
| <b>2</b>  | Hypertension                | Hypertension                               | 6150 (4), 6153 (2), 6177 (2), 20002 (1065)                 |
|           |                             | Essential hypertension                     | 20002 (1072)                                               |
| <b>3</b>  | Diabetes                    | Diabetes                                   | 2443 (1), 6153 (3), 6177 (3), 20002 (1220)                 |
|           |                             | Type 1 diabetes                            | 20002 (1222)                                               |
|           |                             | Type 2 diabetes                            | 20002 (1223)                                               |
|           |                             | Diabetic nephropathy                       | 20002 (1607)                                               |
|           |                             | Diabetic neuropathy/ulcers                 | 20002 (1468)                                               |
|           |                             | Diabetic eye disease                       | 6148 (1), 20002 (1276)                                     |
| <b>4</b>  | Coronary heart disease      | Heart attack/MI                            | 6150 (1), 20002 (1075)                                     |
|           |                             | Angina                                     | 6150 (2), 20002 (1074)                                     |
| <b>5</b>  | Stroke/TIA                  | Stroke                                     | 6150 (3), 20002 (1081)                                     |
|           |                             | TIA                                        | 20002 (1082)                                               |
|           |                             | Subarachnoid haemorrhage                   | 20002 (1086)                                               |
|           |                             | Brain haemorrhage                          | 20002 (1491)                                               |
|           |                             | Ischaemic stroke                           | 20002 (1583)                                               |
| <b>6</b>  | Atrial fibrillation         | Atrial fibrillation                        | 20002 (1471)                                               |
| <b>7</b>  | Heart failure               | Heart failure/pulmonary oedema             | 20002 (1076)                                               |
|           |                             | Cardiomyopathy                             | 20002 (1079)                                               |
|           |                             | Hypertrophic cardiomyopathy                | 20002 (1588)                                               |
| <b>8</b>  | Peripheral vascular disease | Peripheral vascular disease                | 20002 (1067)                                               |
|           |                             | Leg claudication/intermittent claudication | 20002 (1087)                                               |
| <b>9</b>  | COPD                        | COPD/Chronic obstructive pulmonary disease | 20002 (1112)                                               |
|           |                             | Emphysema/Chronic bronchitis               | 6152 (6), 20002 (1113)                                     |
|           |                             | Emphysema                                  | 20002 (1472)                                               |
| <b>10</b> | Asthma                      | Asthma                                     | 6152 (8), 20002 (1111)                                     |
| <b>11</b> | Bronchiectasis              | Bronchiectasis                             | 20002 (1114)                                               |
| <b>12</b> | Dyspepsia                   | Gastro-oesophageal reflux (GORD)           | 20002 (1138)                                               |
|           |                             | Oesophagitis/Barrett's oesophagus          | 20002 (1139)                                               |
|           |                             | Gastric stomach ulcers                     | 20002 (1142)                                               |
|           |                             | Gastric erosions/gastritis                 | 20002 (1143)                                               |
|           |                             | Duodenal ulcer                             | 20002 (1457)                                               |
|           |                             | Dyspepsia/indigestion                      | 20002 (1510)                                               |
|           |                             | Hiatus hernia                              | 20002 (1474)                                               |
|           |                             | Helicobacter pylori                        | 20002 (1442)                                               |
| <b>13</b> | Diverticular disease        | Diverticular disease/diverticulitis        | 20002 (1458)                                               |

|           |                                          |                                   |                        |
|-----------|------------------------------------------|-----------------------------------|------------------------|
| <b>14</b> | Irritable bowel syndrome                 | Irritable bowel syndrome          | 20002 (1154)           |
| <b>15</b> | Chronic liver disease                    | Oesophageal varices               | 20002 (1141)           |
|           |                                          | Non infective hepatitis           | 20002 (1157)           |
|           |                                          | Liver failure/cirrhosis           | 20002 (1158)           |
|           |                                          | Primary biliary cirrhosis         | 20002 (1506)           |
| <b>16</b> | Inflammatory bowel disease               | Inflammatory bowel disease        | 20002 (1461)           |
|           |                                          | Crohn's disease                   | 20002 (1462)           |
|           |                                          | Ulcerative colitis                | 20002 (1463)           |
| <b>17</b> | Constipation                             | Constipation                      | 20002 (1599)           |
| <b>18</b> | Viral hepatitis                          | Hepatitis B                       | 20002 (1579)           |
|           |                                          | Hepatitis C                       | 20002 (1580)           |
|           |                                          | Hepatitis D                       | 20002 (1581)           |
| <b>19</b> | Depression                               | Depression                        | 20002 (1286)           |
|           |                                          | Postnatal depression              | 20002 (1531)           |
| <b>20</b> | Anxiety                                  | Anxiety/panic attacks             | 20002 (1287)           |
|           |                                          | Nervous breakdown                 | 20002 (1288)           |
|           |                                          | Post-traumatic stress disorder    | 20002 (1469)           |
|           |                                          | Obsessive compulsive disorder     | 20002 (1615)           |
|           |                                          | Stress                            | 20002 (1614)           |
|           |                                          | Insomnia                          | 1200 (3), 20002 (1616) |
|           |                                          | Psychological/psychiatric problem | 20002 (1243)           |
| <b>21</b> | Schizophrenia/Bipolar affective disorder | Schizophrenia                     | 20002 (1289)           |
|           |                                          | Mania                             | 20002 (1291)           |
|           |                                          | Bipolar disorder                  | 20002 (1291)           |
|           |                                          | Manic depression                  | 20002 (1291)           |
| <b>22</b> | Connective tissue diseases               | Myositis/myopathy                 | 20002 (1322)           |
|           |                                          | Systemic lupus erythematosus/SLE  | 20002 (1381)           |
|           |                                          | Connective tissue disorder        | 20002 (1373)           |
|           |                                          | Sjogren's syndrome.sicca syndrome | 20002 (1382)           |
|           |                                          | Dermatopolymyositis               | 20002 (1383)           |
|           |                                          | Scleroderma/systemic sclerosis    | 20002 (1384)           |
|           |                                          | Rheumatoid arthritis              | 20002 (1464)           |
|           |                                          | Psoriatic arthropathy             | 20002 (1477)           |
|           |                                          | Dermatomyositis                   | 20002 (1480)           |
|           |                                          | Polymyositis                      | 20002 (1481)           |
|           |                                          | Polymyalgia rheumatica            | 20002 (1377)           |
| <b>23</b> | Painful conditions                       | Back pain                         | 20002 (1534)           |
|           |                                          | Joint pain                        | 20002 (1537)           |
|           |                                          | Headaches (not migraine)          | 20002 (1436)           |
|           |                                          | Sciatica                          | 20002 (1476)           |
|           |                                          | Plantar fasciitis                 | 20002 (1540)           |
|           |                                          | Carpal tunnel syndrome            | 20002 (1541)           |



|           |                        |                                             |                        |
|-----------|------------------------|---------------------------------------------|------------------------|
|           |                        | Fibromyalgia                                | 20002 (1542)           |
|           |                        | Arthritis                                   | 20002 (1538)           |
|           |                        | Shingles                                    | 20002 (1573)           |
|           |                        | Disc problem                                | 20002 (1532)           |
|           |                        | Prolapsed disc/slipped disc                 | 20002 (1312)           |
|           |                        | Spine arthritis/spondylitis                 | 20002 (1311)           |
|           |                        | Ankylosing spondylitis                      | 20002 (1313)           |
|           |                        | Back problem                                | 20002 (1294)           |
|           |                        | Osteoarthritis                              | 20002 (1465)           |
|           |                        | Gout                                        | 20002 (1466)           |
|           |                        | Cervical spondylosis                        | 20002 (1478)           |
|           |                        | Trigeminal neuralgia                        | 20002 (1523)           |
|           |                        | Disc degeneration                           | 20002 (1533)           |
|           |                        | Trapped nerve/compressed nerve              | 20002 (1257)           |
| <b>24</b> | Osteoporosis           | Osteoporosis                                | 20002 (1309)           |
| <b>25</b> | Thyroid disorders      | Thyroid problem (not cancer)                | 20002 (1224)           |
|           |                        | Hyperthyroidism/thyrotoxicosis              | 20002 (1225)           |
|           |                        | Hypothyroidism/myxoedema                    | 20002 (1226)           |
|           |                        | Grave's disease                             | 20002 (1522)           |
|           |                        | Thyroid goitre                              | 20002 (1610)           |
|           |                        | Thyroiditis                                 | 20002 (1428)           |
| <b>26</b> | Alcohol problems       | Alcohol dependency                          | 20002 (1408)           |
|           |                        | Alcoholic liver disease/alcoholic cirrhosis | 20002 (1604)           |
| <b>27</b> | Chronic kidney disease | Polycystic kidney                           | 20002 (1427)           |
|           |                        | Diabetic nephropathy                        | 20002 (1607)           |
|           |                        | Renal/kidney failure                        | 20002 (1192)           |
|           |                        | Renal failure requiring dialysis            | 20002 (1193)           |
|           |                        | Renal failure not requiring dialysis        | 20002 (1194)           |
|           |                        | Kidney nephropathy                          | 20002 (1519)           |
|           |                        | Immunoglobulin A (IgA) nephropathy          | 20002 (1520)           |
| <b>28</b> | Prostate disorders     | Prostate problem (not cancer)               | 20002 (1207)           |
|           |                        | Enlarged prostate                           | 20002 (1396)           |
|           |                        | Benign prostatic hypertrophy                | 20002 (1516)           |
| <b>29</b> | Glaucoma               | Glaucoma                                    | 6148 (2), 20002 (1277) |
| <b>30</b> | Epilepsy               | Epilepsy                                    | 20002 (1264)           |
| <b>31</b> | Dementia               | Dementia/Alzheimer/cognitive impairment     | 20002 (1263)           |
| <b>32</b> | Psoriasis or eczema    | Eczema/dermatitis                           | 20002 (1452)           |
|           |                        | Psoriasis                                   | 20002 (1453)           |
| <b>33</b> | Migraine               | Migraine                                    | 20002 (1265)           |
| <b>34</b> | Chronic sinusitis      | Chronic sinusitis                           | 20002 (1416)           |

|           |                          |                                         |              |
|-----------|--------------------------|-----------------------------------------|--------------|
| <b>35</b> | Anorexia or bulimia      | Anorexia, bulimia/other eating disorder | 20002 (1470) |
| <b>36</b> | Parkinson's disease      | Parkinson's disease                     | 20002 (1262) |
| <b>37</b> | Multiple sclerosis       | Multiple sclerosis                      | 20002 (1261) |
| <b>38</b> | Chronic fatigue syndrome | Chronic fatigue syndrome                | 20002 (1482) |
| <b>39</b> | Endometriosis            | Endometriosis                           | 20002 (1402) |
| <b>40</b> | Meniere disease          | Meniere disease                         | 20002 (1421) |
| <b>41</b> | Pernicious anaemia       | Pernicious anaemia                      | 20002 (1331) |
| <b>42</b> | Polycystic ovaries       | Polycystic ovaries                      | 20002 (1350) |

**Supplemental Table 8. Definition of refined grains.**

| Diet component | UKB variable | label                      | Coding (standard servings per day)            |
|----------------|--------------|----------------------------|-----------------------------------------------|
| Refined grains | 100940       | Bread consumed             | 0/1, N/Y                                      |
|                | 100950       | Sliced bread intake        | 555/1/2/3/4/5/600, ½ /1/2/3/4/5/6+            |
|                | 20091        | Type of sliced bread eaten | 1/2/3/4/5, white/mixed/wholemeal/seeded/other |
|                | 101230       | Naan bread intake          | 555/1/2/3/4/5/600, ½ /1/2/3/4/5/6+            |
|                | 101240       | Garlic bread intake        | 555/1/2/3/4/5/600, ½ /1/2/3/4/5/6+            |
|                | 102700       | Starchy food consumers     | 0/1, N/Y                                      |
|                | 102710       | White pasta intake         | 555/1/200, ½ /1/2+                            |
|                | 102730       | White rice intake          | 555/1/200, ½ /1/2+                            |
|                | 102760       | Snackpot intake            | 555/1/200, ½ /1/2+                            |
|                | 102010       | Pancake intake             | 555/1/2/3/400, ½ /1/2/3/4+                    |
|                | 102020       | Scotch pancake intake      | 555/1/2/3/400, ½ /1/2/3/4+                    |
|                | 102050       | Croissant intake           | 555/1/2/3/400, ½ /1/2/3/4+                    |
|                | 102070       | Scone intake               | 555/1/2/3/400, ½ /1/2/3/4+                    |
|                | 102400       | Savoury snack consumers    | 0/1, N/Y                                      |
|                | 102470       | Savoury biscuits intake    | 555/1/2/300, ½ /1/2/3+                        |
|                | 102480       | Cheesy biscuits intake     | 555/1/2/300, ½ /1/2/3+                        |
|                | 102500       | Other savoury snack intake | 555/1/2/300, ½ /1/2/3+                        |

Since 20091 is not exclusive, we derived a “servings of whole-white bread” variable weighted by response. Used mean intake across diet records for each item then summed item means for daily servings.

Note: N: no; Y: yes.

**Supplemental Table 9. Detailed information on missing covariates.**

| <b>Covariates</b>                                   | <b>N*</b> | <b>Missing rate (%)</b> |
|-----------------------------------------------------|-----------|-------------------------|
| Townsend deprivation index                          | 219       | 0.1                     |
| Ethnicity                                           | 503       | 0.3                     |
| BMI                                                 | 423       | 0.2                     |
| Basal metabolic rate                                | 2702      | 1.4                     |
| Household income                                    | 18688     | 10.0                    |
| Education                                           | 669       | 0.4                     |
| Family history of cancer                            | 2510      | 1.3                     |
| Family history of CVD                               | 2510      | 1.3                     |
| Self-reported CVD                                   | 11        | 0.0                     |
| Self-reported cancer                                | 301       | 0.2                     |
| NSAIDs user                                         | 1287      | 0.7                     |
| IPAQ                                                | 27779     | 14.9                    |
| Smoking status                                      | 295       | 0.2                     |
| Pack-years of smoking for current or former smokers | 27724     | 14.9                    |
| Vitamin use                                         | 365       | 0.2                     |
| Minerals and other dietary supplements use          | 129       | 0.1                     |
| Cereal on average in past year                      | 191       | 0.1                     |
| Healthy sleep pattern                               | 29633     | 15.9                    |

Note: \*N represents the number of missing responses.

Abbreviations: BMI, body mass index (calculated as weight in kilograms divided by height in meters squared); CVD, cardiovascular disease; IPAQ, International Physical Activity Questionnaire.

**Supplemental Table 10. Mean (SD) consumption of sugar and artificially sweetener added to cereal across multiple 24-hour dietary recalls.**

| The number of times participants completed 24-hour dietary recalls | Number of participants (%) |                                  | Mean consumption (SD)                  |                                                         |
|--------------------------------------------------------------------|----------------------------|----------------------------------|----------------------------------------|---------------------------------------------------------|
|                                                                    | Sugar-sweetened consumers  | Artificially sweetened consumers | Sugar added to cereal (teaspoons/bowl) | Artificially sweetener added to cereal (teaspoons/bowl) |
| 1 time                                                             | 11528 (46.9%)              | 2196 (49.7%)                     | 1.1 ± 0.6                              | 1.2 ± 0.7                                               |
| 2 times                                                            | 5602 (22.8%)               | 992 (22.5%)                      | 1.1 ± 0.6                              | 1.2 ± 0.7                                               |
| 3 times                                                            | 4310 (17.5%)               | 725 (16.4%)                      | 1.1 ± 0.6                              | 1.3 ± 0.7                                               |
| 4 times                                                            | 2695 (11.0%)               | 449 (10.2%)                      | 1.1 ± 0.6                              | 1.4 ± 0.7                                               |
| 5 times                                                            | 440 (1.8%)                 | 55 (1.2%)                        | 1.2 ± 0.6                              | 1.4 ± 0.7                                               |
| Total                                                              | 24575 (100.0%)             | 4417 (100.0%)                    | 1.1 ± 0.6                              | 1.2 ± 0.7                                               |

**Supplemental Table 11. Associations of cereal consumption with all-cause and cause-specific mortality after excluding participants with missing covariates.**

| Outcome                              | Events/Model         | Non-consumers | Cereal consumers |                  |                  |
|--------------------------------------|----------------------|---------------|------------------|------------------|------------------|
|                                      |                      |               | 0-0.5 bowls/d    | 0.5-1.5 bowls/d  | >1.5 bowls/d     |
| <b>Unsweetened cereal</b>            |                      |               |                  |                  |                  |
| All-cause mortality<br>(n = 85137)   | Events, n (%)        | 1723 (6.0)    | 709 (4.6)        | 1763 (5.3)       | 381 (5.1)        |
|                                      | Multivariable model* | 1 (Reference) | 0.84 (0.77-0.92) | 0.88 (0.82-0.95) | 0.88 (0.79-0.99) |
| Cancer mortality<br>(n = 78679)      | Events, n (%)        | 725 (2.7)     | 332 (2.3)        | 789 (2.6)        | 185 (2.7)        |
|                                      | Multivariable model* | 1 (Reference) | 0.92 (0.80-1.05) | 0.96 (0.87-1.07) | 1.04 (0.88-1.23) |
| CVD mortality<br>(n = 81135)         | Events, n (%)        | 254 (0.9)     | 85 (0.6)         | 240 (0.8)        | 45 (0.6)         |
|                                      | Multivariable model* | 1 (Reference) | 0.70 (0.54-0.90) | 0.85 (0.70-1.02) | 0.72 (0.52-1.00) |
| <b>Sugar-sweetened cereal</b>        |                      |               |                  |                  |                  |
| All-cause mortality<br>(n = 41847)   | Events, n (%)        | 1723 (6.0)    | 75 (7.0)         | 687 (6.6)        | 120 (7.8)        |
|                                      | Multivariable model* | 1 (Reference) | 0.91 (0.72-1.15) | 0.92 (0.84-1.00) | 0.98 (0.81-1.18) |
| Cancer mortality<br>(n = 38625)      | Events, n (%)        | 725 (2.7)     | 37 (3.7)         | 302 (3.2)        | 52 (3.6)         |
|                                      | Multivariable model* | 1 (Reference) | 1.16 (0.83-1.62) | 1.02 (0.89-1.17) | 1.09 (0.82-1.46) |
| CVD mortality<br>(n = 39633)         | Events, n (%)        | 254 (0.9)     | 10 (1.0)         | 86 (0.9)         | 20 (1.4)         |
|                                      | Multivariable model* | 1 (Reference) | 0.78 (0.41-1.47) | 0.78 (0.60-1.00) | 1.02 (0.64-1.63) |
| <b>Artificially sweetened cereal</b> |                      |               |                  |                  |                  |
| All-cause mortality<br>(n = 31073)   | Events, n (%)        | 1723 (6.0)    | 15 (7.4)         | 139 (7.8)        | 28 (8.4)         |
|                                      | Multivariable model* | 1 (Reference) | 0.87 (0.52-1.45) | 0.97 (0.81-1.15) | 1.09 (0.75-1.59) |
| Cancer mortality<br>(n = 28738)      | Events, n (%)        | 725 (2.7)     | 4 (2.2)          | 58 (3.6)         | 16 (5.2)         |
|                                      | Multivariable model* | 1 (Reference) | 0.68 (0.25-1.82) | 1.09 (0.83-1.43) | 1.54 (0.93-2.55) |
| CVD mortality<br>(n = 29487)         | Events, n (%)        | 354 (0.9)     | 2 (1.1)          | 17 (1.0)         | 2 (0.7)          |
|                                      | Multivariable model* | 1 (Reference) | 0.83 (0.21-3.36) | 0.89 (0.54-1.46) | 0.52 (0.13-2.10) |

Note: CVD: cardiovascular disease.

\*Estimates are hazard ratios (95% confidence intervals), obtained from fully adjusted Cox regression models.

**Supplemental Table 12. Associations of cereal consumption with all-cause and cause-specific mortality after excluding participants who had an outcome event during the first two years of follow-up.**

| Outcome                              | Events/Model         | Non-consumers | Cereal consumers |                  |                  |
|--------------------------------------|----------------------|---------------|------------------|------------------|------------------|
|                                      |                      |               | 0-0.5 bowls/d    | 0.5-1.5 bowls/d  | >1.5 bowls/d     |
| <b>Unsweetened cereal</b>            |                      |               |                  |                  |                  |
| All-cause mortality<br>(n = 157178)  | Events, n (%)        | 3336 (6.2)    | 1447 (5.1)       | 3475 (5.6)       | 731 (5.5)        |
|                                      | Multivariable model* | 1 (Reference) | 0.90 (0.84-0.95) | 0.91 (0.86-0.95) | 0.91 (0.84-0.99) |
| Cancer mortality<br>(n = 144654)     | Events, n (%)        | 1412 (2.9)    | 633 (2.4)        | 1501 (2.6)       | 330 (2.7)        |
|                                      | Multivariable model* | 1 (Reference) | 0.90 (0.81-0.99) | 0.93 (0.86-1.01) | 0.99 (0.87-1.12) |
| CVD mortality<br>(n = 149061)        | Events, n (%)        | 474 (0.9)     | 188 (0.7)        | 458 (0.8)        | 97 (0.8)         |
|                                      | Multivariable model* | 1 (Reference) | 0.84 (0.71-1.00) | 0.87 (0.76-0.99) | 0.85 (0.68-1.07) |
| <b>Sugar-sweetened cereal</b>        |                      |               |                  |                  |                  |
| All-cause mortality<br>(n = 78083)   | Events, n (%)        | 3336 (6.2)    | 154 (7.1)        | 1321 (6.8)       | 230 (8.1)        |
|                                      | Multivariable model* | 1 (Reference) | 0.95 (0.81-1.12) | 0.94 (0.88-1.00) | 0.99 (0.86-1.13) |
| Cancer mortality<br>(n = 71813)      | Events, n (%)        | 1412 (2.9)    | 66 (3.3)         | 577 (3.2)        | 97 (3.7)         |
|                                      | Multivariable model* | 1 (Reference) | 0.99 (0.77-1.27) | 1.00 (0.91-1.11) | 1.05 (0.85-1.29) |
| CVD mortality<br>(n = 73633)         | Events, n (%)        | 474 (0.9)     | 18 (0.9)         | 178 (1.0)        | 40 (1.5)         |
|                                      | Multivariable model* | 1 (Reference) | 0.77 (0.48-1.24) | 0.91 (0.76-1.09) | 1.15 (0.83-1.60) |
| <b>Artificially sweetened cereal</b> |                      |               |                  |                  |                  |
| All-cause mortality<br>(n = 57971)   | Events, n (%)        | 3336 (6.2)    | 39 (9.2)         | 264 (7.8)        | 47 (7.5)         |
|                                      | Multivariable model* | 1 (Reference) | 1.08 (0.79-1.49) | 0.96 (0.85-1.09) | 0.93 (0.69-1.24) |
| Cancer mortality<br>(n = 53387)      | Events, n (%)        | 1412 (2.9)    | 14 (3.7)         | 99 (3.2)         | 25 (4.3)         |
|                                      | Multivariable model* | 1 (Reference) | 1.05 (0.62-1.79) | 0.93 (0.76-1.14) | 1.20 (0.80-1.78) |
| CVD mortality<br>(n = 54704)         | Events, n (%)        | 474 (0.9)     | 5 (1.3)          | 39 (1.3)         | 3 (0.5)          |
|                                      | Multivariable model* | 1 (Reference) | 1.02 (0.42-2.47) | 1.11 (0.80-1.55) | 0.43 (0.14-1.33) |

Note: CVD: cardiovascular disease.

\*Estimates are hazard ratios (95% confidence intervals), obtained from fully adjusted Cox regression models.

**Supplemental Table 13. Associations of cereal consumption with all-cause and cause-specific mortality after excluding participants who were not on a typical diet yesterday.**

| Outcome                              | Events/Model         | Non-consumers | Cereal consumers |                  |                  |
|--------------------------------------|----------------------|---------------|------------------|------------------|------------------|
|                                      |                      |               | 0-0.5 bowls/d    | 0.5-1.5 bowls/d  | >1.5 bowls/d     |
| <b>Unsweetened cereal</b>            |                      |               |                  |                  |                  |
| All-cause mortality<br>(n = 107141)  | Events, n (%)        | 2570 (7.0)    | 1124 (5.8)       | 2656 (6.1)       | 471 (5.8)        |
|                                      | Multivariable model* | 1 (Reference) | 0.92 (0.86-0.99) | 0.90 (0.85-0.95) | 0.87 (0.78-0.96) |
| Cancer mortality<br>(n = 98480)      | Events, n (%)        | 1061 (3.2)    | 466 (2.6)        | 1114 (2.8)       | 208 (2.8)        |
|                                      | Multivariable model* | 1 (Reference) | 0.90 (0.80-1.01) | 0.92 (0.84-1.01) | 0.94 (0.81-1.09) |
| CVD mortality<br>(n = 101144)        | Events, n (%)        | 369 (1.1)     | 149 (0.8)        | 354 (0.9)        | 64 (0.8)         |
|                                      | Multivariable model* | 1 (Reference) | 0.87 (0.71-1.06) | 0.86 (0.74-1.00) | 0.82 (0.63-1.08) |
| <b>Sugar-sweetened cereal</b>        |                      |               |                  |                  |                  |
| All-cause mortality<br>(n = 54523)   | Events, n (%)        | 2570 (7.0)    | 124 (7.8)        | 1071 (7.4)       | 163 (8.4)        |
|                                      | Multivariable model* | 1 (Reference) | 0.95 (0.79-1.14) | 0.93 (0.86-1.00) | 0.92 (0.78-1.08) |
| Cancer mortality<br>(n = 50058)      | Events, n (%)        | 1061 (3.2)    | 54 (3.8)         | 443 (3.3)        | 61 (3.5)         |
|                                      | Multivariable model* | 1 (Reference) | 1.04 (0.79-1.37) | 0.95 (0.85-1.07) | 0.90 (0.69-1.18) |
| CVD mortality<br>(n = 51156)         | Events, n (%)        | 369 (1.1)     | 15 (1.0)         | 149 (1.1)        | 30 (1.7)         |
|                                      | Multivariable model* | 1 (Reference) | 0.80 (0.47-1.34) | 0.93 (0.76-1.13) | 1.15 (0.79-1.69) |
| <b>Artificially sweetened cereal</b> |                      |               |                  |                  |                  |
| All-cause mortality<br>(n = 39781)   | Events, n (%)        | 2570 (7.0)    | 32 (9.9)         | 209 (8.3)        | 38 (8.6)         |
|                                      | Multivariable model* | 1 (Reference) | 1.04 (0.74-1.48) | 0.90 (0.78-1.04) | 0.97 (0.71-1.34) |
| Cancer mortality<br>(n = 36587)      | Events, n (%)        | 1061 (3.2)    | 14 (4.8)         | 78 (3.4)         | 20 (4.8)         |
|                                      | Multivariable model* | 1 (Reference) | 1.29 (0.76-2.20) | 0.90 (0.71-1.13) | 1.25 (0.80-1.95) |
| CVD mortality<br>(n = 37318)         | Events, n (%)        | 369 (1.1)     | 2 (0.7)          | 28 (1.2)         | 1 (0.2)          |
|                                      | Multivariable model* | 1 (Reference) | 0.45 (0.11-1.80) | 0.92 (0.62-1.36) | 0.18 (0.02-1.26) |

Note: CVD: cardiovascular disease.

\*Estimates are hazard ratios (95% confidence intervals), obtained from fully adjusted Cox regression models.



**Supplemental Table 14. Associations of cereal consumption with all-cause and cause-specific mortality after removing sugar added to cereal from total sugar and total energy.**

| Outcome                              | Events/Model         | Non-consumers | Cereal consumers |                  |                  |
|--------------------------------------|----------------------|---------------|------------------|------------------|------------------|
|                                      |                      |               | 0-0.5 bowls/d    | 0.5-1.5 bowls/d  | >1.5 bowls/d     |
| <b>Unsweetened cereal</b>            |                      |               |                  |                  |                  |
| All-cause mortality<br>(n = 157427)  | Events, n (%)        | 3457 (6.4)    | 1490 (5.3)       | 3556 (5.7)       | 735 (5.5)        |
|                                      | Multivariable model* | 1 (Reference) | 0.89 (0.84-0.95) | 0.90 (0.86-0.94) | 0.89 (0.82-0.97) |
| Cancer mortality<br>(n = 144815)     | Events, n (%)        | 1441 (2.9)    | 644 (2.5)        | 1528 (2.7)       | 332 (2.7)        |
|                                      | Multivariable model* | 1 (Reference) | 0.90 (0.81-0.99) | 0.93 (0.86-1.00) | 0.98 (0.86-1.11) |
| CVD mortality<br>(n = 149266)        | Events, n (%)        | 492 (1.0)     | 191 (0.8)        | 468 (0.8)        | 97 (0.8)         |
|                                      | Multivariable model* | 1 (Reference) | 0.82 (0.69-0.98) | 0.86 (0.75-0.98) | 0.83 (0.66-1.04) |
| <b>Sugar-sweetened cereal</b>        |                      |               |                  |                  |                  |
| All-cause mortality<br>(n = 78256)   | Events, n (%)        | 3457 (6.4)    | 159 (7.3)        | 1362 (7.0)       | 236 (8.2)        |
|                                      | Multivariable model* | 1 (Reference) | 0.96 (0.81-1.12) | 0.94 (0.88-1.01) | 0.99 (0.87-1.13) |
| Cancer mortality<br>(n = 71917)      | Events, n (%)        | 1441 (2.9)    | 68 (3.4)         | 594 (3.3)        | 100 (3.8)        |
|                                      | Multivariable model* | 1 (Reference) | 1.00 (0.78-1.28) | 1.02 (0.92-1.12) | 1.06 (0.87-1.31) |
| CVD mortality<br>(n = 73775)         | Events, n (%)        | 492 (1.0)     | 18 (0.9)         | 182 (1.0)        | 40 (1.5)         |
|                                      | Multivariable model* | 1 (Reference) | 0.74 (0.46-1.19) | 0.90 (0.75-1.07) | 1.11 (0.80-1.54) |
| <b>Artificially sweetened cereal</b> |                      |               |                  |                  |                  |
| All-cause mortality<br>(n = 58098)   | Events, n (%)        | 3457 (6.4)    | 39 (9.2)         | 268 (8.0)        | 49 (7.8)         |
|                                      | Multivariable model* | 1 (Reference) | 1.04 (0.76-1.43) | 0.94 (0.83-1.07) | 0.94 (0.71-1.25) |
| Cancer mortality<br>(n = 53466)      | Events, n (%)        | 1441 (2.9)    | 14 (3.7)         | 99 (3.2)         | 26 (4.4)         |
|                                      | Multivariable model* | 1 (Reference) | 1.03 (0.61-1.75) | 0.91 (0.74-1.12) | 1.22 (0.83-1.81) |
| CVD mortality<br>(n = 54806)         | Events, n (%)        | 492 (1.0)     | 5 (1.3)          | 39 (1.3)         | 3 (0.5)          |
|                                      | Multivariable model* | 1 (Reference) | 0.98 (0.40-2.37) | 1.07 (0.76-1.48) | 0.41 (0.13-1.28) |

Note: CVD: cardiovascular disease.

\*Estimates are hazard ratios (95% confidence intervals), obtained from fully adjusted Cox regression models.

**Supplemental Table 15. Associations of cereal consumption with all-cause and cause-specific mortality after excluding participants who ate cereal last year but not the day before.**

| Outcome                              | Events/Model                          | Non-consumers               | Cereal consumers               |                                |                               |
|--------------------------------------|---------------------------------------|-----------------------------|--------------------------------|--------------------------------|-------------------------------|
|                                      |                                       |                             | 0-0.5 bowls/d                  | 0.5-1.5 bowls/d                | >1.5 bowls/d                  |
| <b>Unsweetened cereal</b>            |                                       |                             |                                |                                |                               |
| All-cause mortality<br>(n = 152854)  | Events, n (%)<br>Multivariable model* | 3457 (6.4)<br>1 (Reference) | 1415 (5.3)<br>0.90 (0.84-0.96) | 3418 (5.7)<br>0.90 (0.86-0.95) | 714 (5.5)<br>0.89 (0.82-0.97) |
| Cancer mortality<br>(n = 140596)     | Events, n (%)<br>Multivariable model* | 1441 (2.9)<br>1 (Reference) | 609 (2.5)<br>0.89 (0.81-0.98)  | 1464 (2.7)<br>0.93 (0.86-1.00) | 321 (2.7)<br>0.97 (0.85-1.10) |
| CVD mortality<br>(n = 144914)        | Events, n (%)<br>Multivariable model* | 492 (1.0)<br>1 (Reference)  | 182 (0.7)<br>0.83 (0.70-0.99)  | 450 (0.8)<br>0.86 (0.75-0.98)  | 95 (0.8)<br>0.83 (0.67-1.05)  |
| <b>Sugar-sweetened cereal</b>        |                                       |                             |                                |                                |                               |
| All-cause mortality<br>(n = 76779)   | Events, n (%)<br>Multivariable model* | 3457 (6.4)<br>1 (Reference) | 140 (7.0)<br>0.91 (0.77-1.08)  | 1273 (7.0)<br>0.93 (0.87-0.99) | 225 (8.2)<br>0.97 (0.85-1.12) |
| Cancer mortality<br>(n = 70558)      | Events, n (%)<br>Multivariable model* | 1441 (2.9)<br>1 (Reference) | 59 (3.2)<br>0.94 (0.72-1.22)   | 543 (3.2)<br>0.98 (0.88-1.09)  | 94 (3.7)<br>1.03 (0.83-1.28)  |
| CVD mortality<br>(n = 72392)         | Events, n (%)<br>Multivariable model* | 492 (1.0)<br>1 (Reference)  | 15 (0.8)<br>0.67 (0.40-1.13)   | 172 (1.0)<br>0.90 (0.75-1.07)  | 36 (1.4)<br>1.04 (0.73-1.47)  |
| <b>Artificially sweetened cereal</b> |                                       |                             |                                |                                |                               |
| All-cause mortality<br>(n = 57864)   | Events, n (%)<br>Multivariable model* | 3457 (6.4)<br>1 (Reference) | 37 (9.6)<br>1.09 (0.79-1.51)   | 257 (8.0)<br>0.96 (0.85-1.09)  | 47 (7.8)<br>0.94 (0.71-1.26)  |
| Cancer mortality<br>(n = 53252)      | Events, n (%)<br>Multivariable model* | 1441 (2.9)<br>1 (Reference) | 14 (4.0)<br>1.15 (0.67-1.94)   | 96 (3.3)<br>0.94 (0.76-1.16)   | 26 (4.6)<br>1.27 (0.86-1.88)  |
| CVD mortality<br>(n = 54593)         | Events, n (%)<br>Multivariable model* | 492 (1.0)<br>1 (Reference)  | 5 (1.4)<br>1.09 (0.45-2.65)    | 37 (1.3)<br>1.07 (0.76-1.50)   | 3 (0.6)<br>0.42 (0.14-1.32)   |

Note: CVD: cardiovascular disease.

\*Estimates are hazard ratios (95% confidence intervals), obtained from fully adjusted Cox regression models.

**Supplemental Table 16. Associations of breakfast cereal consumption with all-cause and specific-cause mortality.**

| Characteristic                           | Non-consumers | Breakfast cereal consumers |                  |                  |
|------------------------------------------|---------------|----------------------------|------------------|------------------|
|                                          |               | 0-0.5 bowls/d              | 0.5-1.5 bowls/d  | >1.5 bowls/d     |
| <b>All-cause mortality (n = 2001905)</b> |               |                            |                  |                  |
| Events, n (%)                            | 3457 (6.4)    | 1707 (5.5)                 | 5644 (6.1)       | 1432 (5.9)       |
| Basic model†                             | 1 (Reference) | 0.74 (0.70-0.79)           | 0.80 (0.77-0.84) | 0.78 (0.73-0.83) |
| Multivariable model*                     | 1 (Reference) | 0.89 (0.84-0.95)           | 0.91 (0.87-0.95) | 0.90 (0.84-0.96) |
| <b>Cancer mortality (n = 185513)</b>     |               |                            |                  |                  |
| Events, n (%)                            | 1441 (2.9)    | 737 (2.6)                  | 2437 (2.9)       | 647 (2.9)        |
| Basic model†                             | 1 (Reference) | 0.77 (0.71-0.85)           | 0.84 (0.79-0.90) | 0.86 (0.78-0.94) |
| Multivariable model*                     | 1 (Reference) | 0.91 (0.83-0.99)           | 0.96 (0.90-1.03) | 1.00 (0.91-1.10) |
| <b>CVD mortality (n = 190894)</b>        |               |                            |                  |                  |
| Events, n (%)                            | 492 (1.0)     | 216 (0.7)                  | 760 (0.9)        | 196 (0.9)        |
| Basic model†                             | 1 (Reference) | 0.65 (0.56-0.77)           | 0.75 (0.67-0.84) | 0.73 (0.62-0.86) |
| Multivariable model*                     | 1 (Reference) | 0.80 (0.68-0.95)           | 0.88 (0.78-0.99) | 0.86 (0.72-1.02) |

Note: CVD: cardiovascular disease.

Note: † Estimates are hazard ratios (95% CIs) from Cox regression models adjusted for age (continuous) and sex (male or female). \* Estimates are hazard ratios (95% CIs) from multivariable Cox regression models additionally adjusted for BMI ( $\geq 30$ ,  $\geq 25$  &  $< 30$ , or  $< 25$  km/m<sup>2</sup>), basal metabolic rate (continuous), ethnicity (White or other), Townsend deprivation index (continuous), household income ( $> 100000$ ,  $52000$ - $100000$ ,  $31000$ - $51999$ ,  $18000$ - $30999$ , or  $< 18,000$  £), education (degree or no degree), smoking status (never, former, or current), pack-years of smoking (continuous), physical activity level (low, moderate, or high), vitamin use (yes or no), mineral and other dietary supplements use (yes or no), NSAIDs use (yes or no), healthy sleep pattern (yes or no), family history of CVD (yes or no), family history of cancer (yes or no), number of long-term conditions (none, one, two, three, four or five and more), and intake of total energy, total sugar, coffee, starchy food, refined grains, snacks, pizza, and a modified AHEI score. HR, hazard ratio; CI, confidence interval; BMI, body mass index; CVD, cardiovascular disease; NSAIDs, Nonsteroidal anti-inflammatory drugs; AHEI, Alternative Healthy Eating Index.

### Histogram of Breakfast Cereal

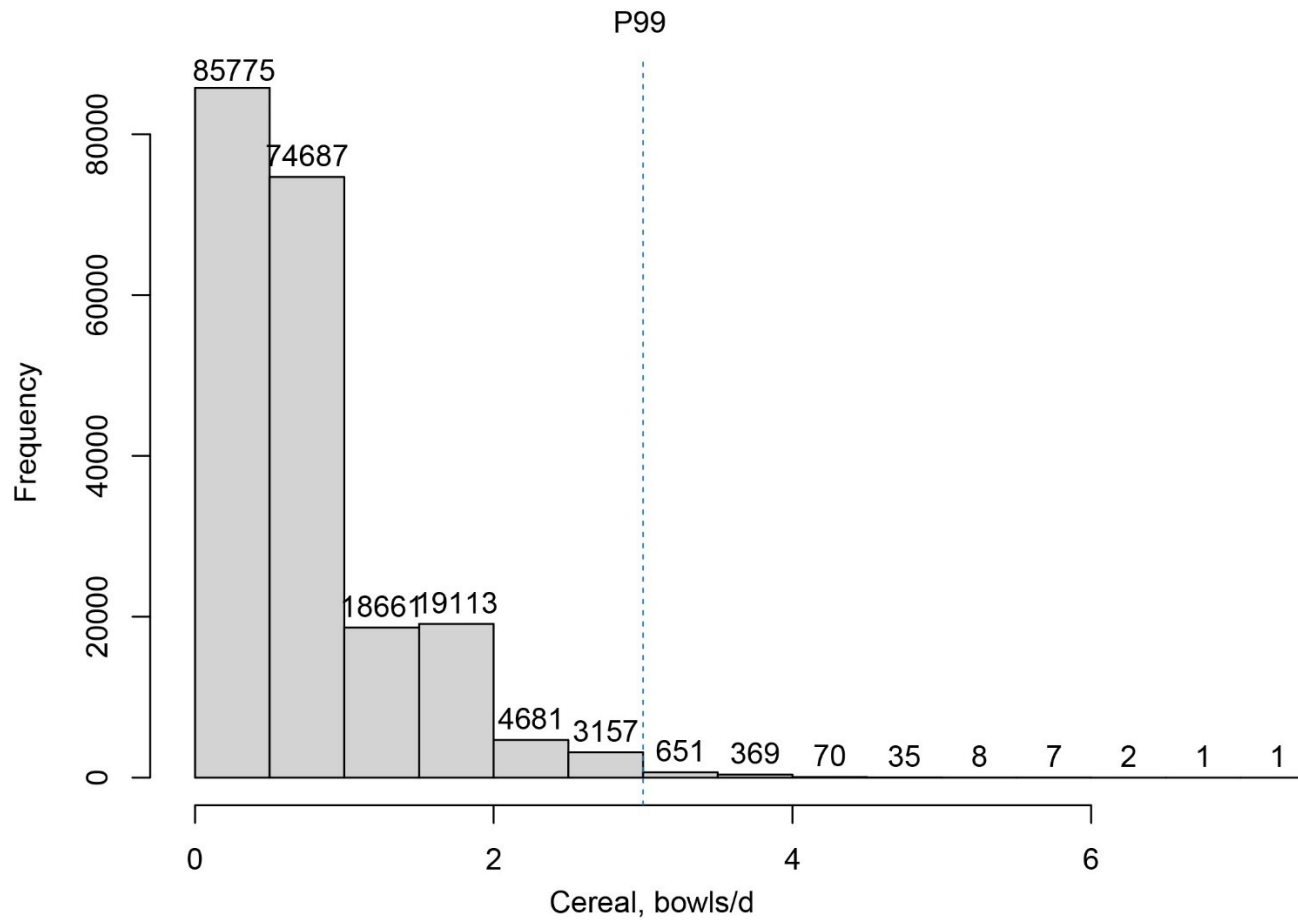

Supplemental Figure 1. Histogram of total cereal intake. The dashed blue line is the 99th percentile of cereal intake.

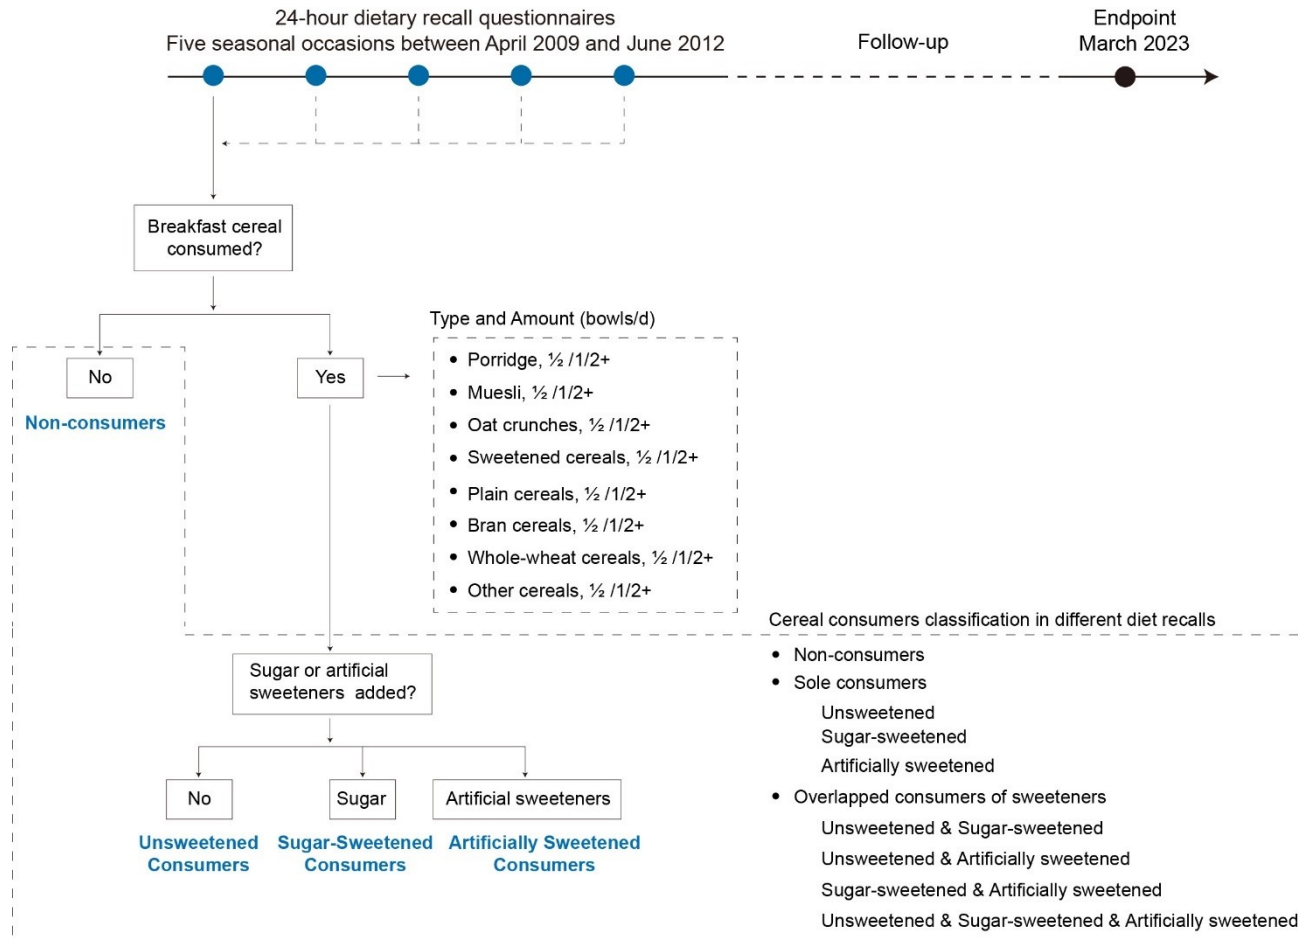

Supplemental Figure 2. Flowchart of four cereal consumer classifications.

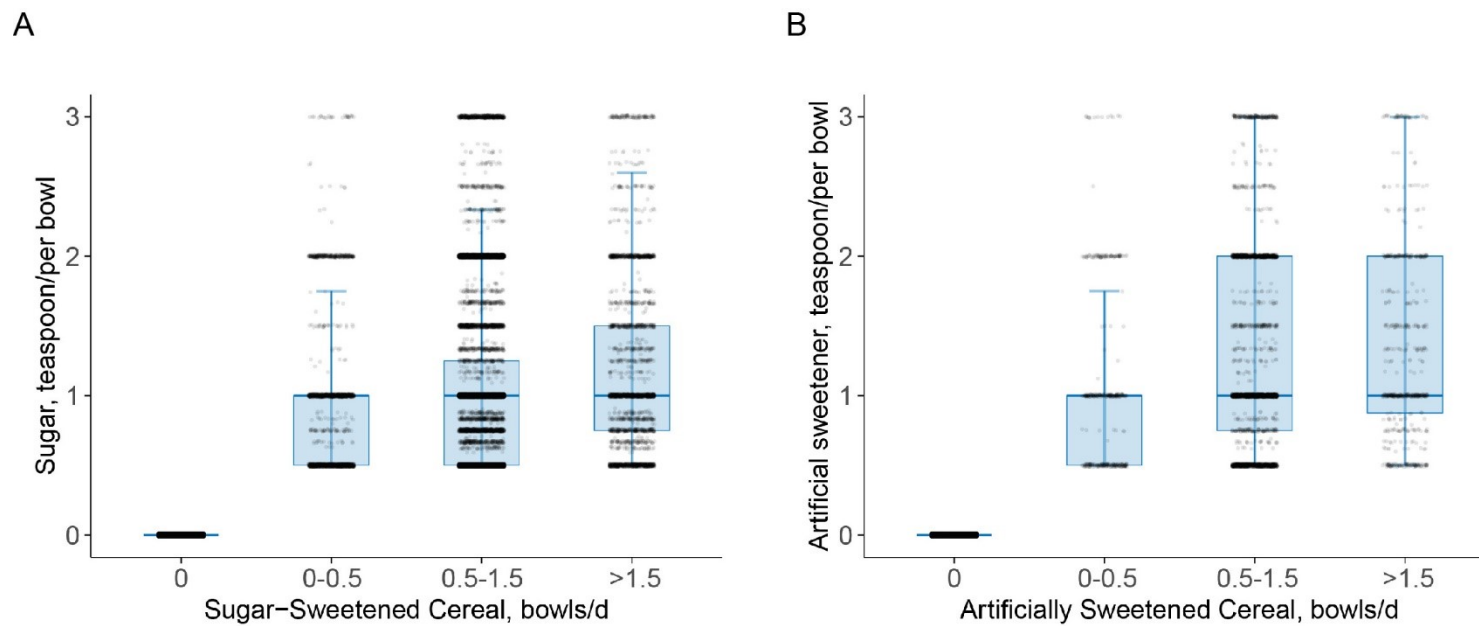

**Supplemental Figure 3. The amount of added sugar or artificial sweetener per bowl of cereal for sugar-sweetened consumers (A) and artificially sweetened consumers (B).**

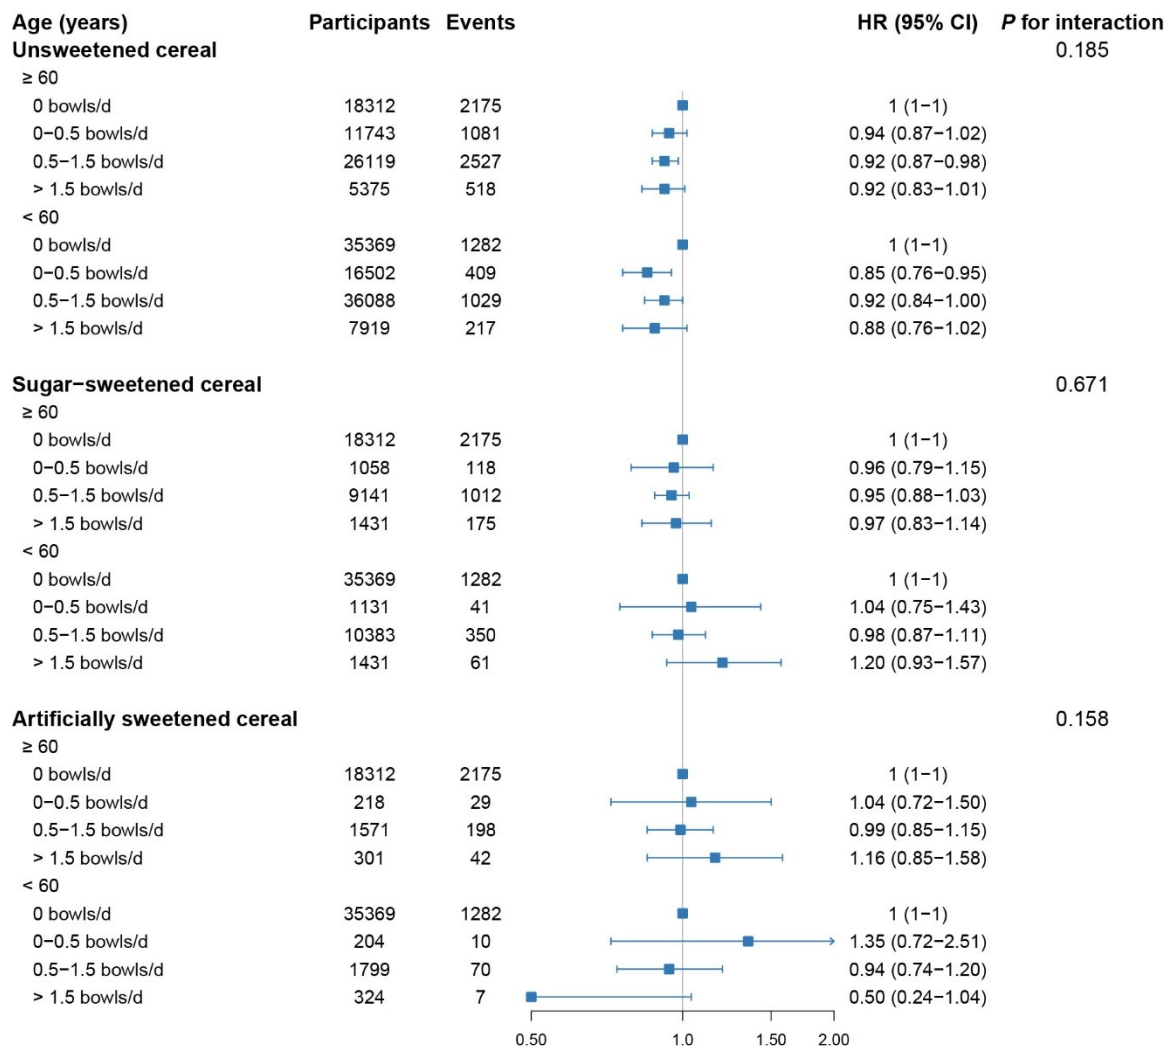

**Supplemental Figure 4. Age-stratified analysis of the association between cereal consumption and all-cause mortality in the multivariable model.**

Note: The multivariable model was adjusted for sex (male or female), BMI ( $\geq 30$ ,  $\geq 25$  &  $< 30$ , or  $< 25$   $\text{kg}/\text{m}^2$ ), basal metabolic rate (continuous), ethnicity (White or other), Townsend deprivation index (continuous), household income ( $> 100000$ ,  $52000$ - $100000$ ,  $31000$ - $51999$ ,  $18000$ - $30999$ , or  $< 18,000$  £), education (degree or no degree), smoking status (never, former, or current), pack-years of smoking (continuous), physical activity level (low, moderate, or high), vitamin use (yes or no), mineral and other dietary supplements use (yes or no), NSAIDs use (yes or no), healthy sleep pattern (yes or no), family history of CVD (yes or no), family history of cancer (yes or no), number of long-term conditions (none, one, two, three, four or five and more), and intake of total energy, total sugar, coffee, starchy food, refined grains, snacks, pizza, and a modified AHEI score. HR, hazard ratio; CI, confidence interval; BMI, body mass index; CVD, cardiovascular disease; NSAIDs, Nonsteroidal anti-inflammatory drugs; AHEI, Alternative Healthy Eating Index.

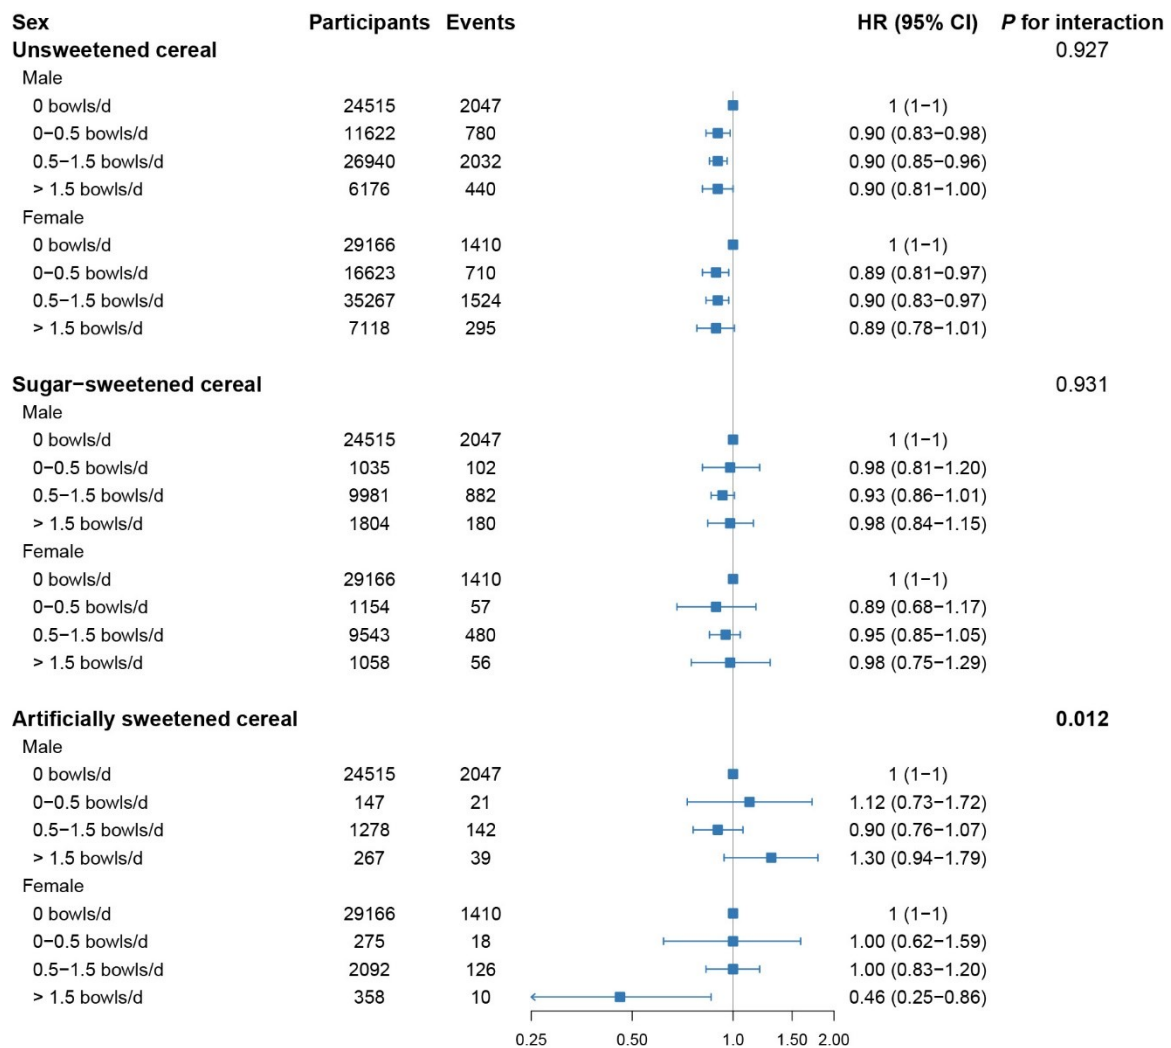

**Supplemental Figure 5. Sex-stratified analysis of the association between cereal consumption and all-cause mortality in the multivariable model.**

Note: The multivariable model was adjusted for age (continuous), BMI ( $\geq 30$ ,  $\geq 25$  &  $< 30$ , or  $< 25$   $\text{kg}/\text{m}^2$ ), basal metabolic rate (continuous), ethnicity (White or other), Townsend deprivation index (continuous), household income ( $> 100000$ ,  $52000$ - $100000$ ,  $31000$ - $51999$ ,  $18000$ - $30999$ , or  $< 18,000$  £), education (degree or no degree), smoking status (never, former, or current), pack-years of smoking (continuous), physical activity level (low, moderate, or high), vitamin use (yes or no), mineral and other dietary supplements use (yes or no), NSAIDs use (yes or no), healthy sleep pattern (yes or no), family history of CVD (yes or no), family history of cancer (yes or no), number of long-term conditions (none, one, two, three, four or five and more), and intake of total energy, total sugar, coffee, starchy food, refined grains, snacks, pizza, and a modified AHEI score. HR, hazard ratio; CI, confidence interval; BMI, body mass index; CVD, cardiovascular disease; NSAIDs, Nonsteroidal anti-inflammatory drugs; AHEI, Alternative Healthy Eating Index.



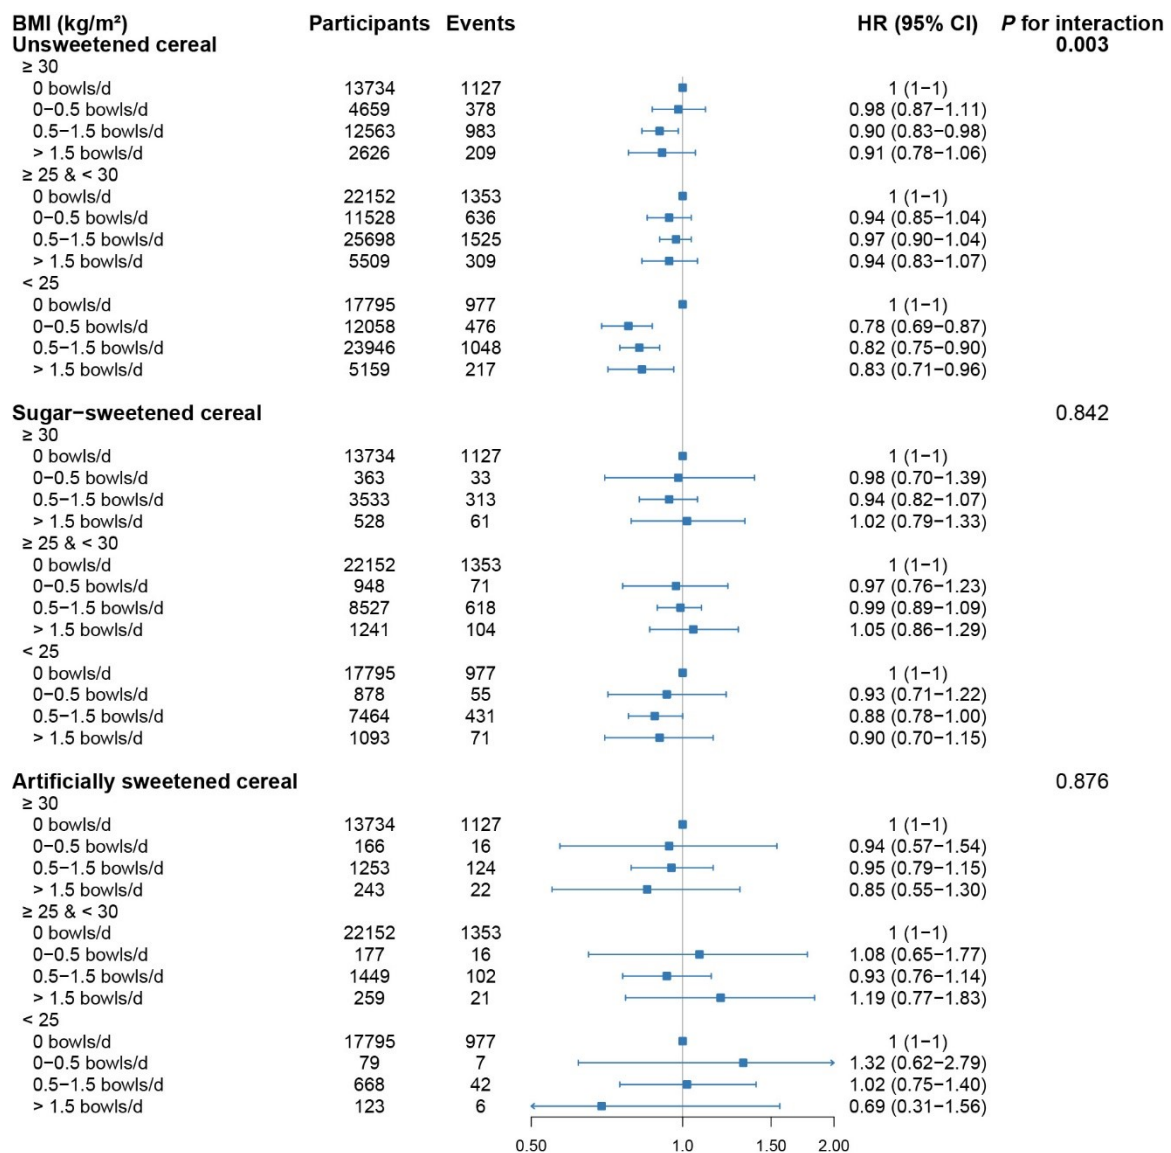

**Supplemental Figure 6. BMI-stratified analysis of the association between cereal consumption and all-cause mortality in the multivariable model.**

Note: The multivariable model was adjusted for age (continuous), sex (male or female), basal metabolic rate (continuous), ethnicity (White or other), Townsend deprivation index (continuous), household income (> 100000, 52000-100000, 31000-51999, 18000-30999, or < 18,000 £), education (degree or no degree), smoking status (never, former, or current), pack-years of smoking (continuous), physical activity level (low, moderate, or high), vitamin use (yes or no), mineral and other dietary supplements use (yes or no), NSAIDs use (yes or no), healthy sleep pattern (yes or no), family history of CVD (yes or no), family history of cancer (yes or no), number of long-term conditions (none, one, two, three, four or five and more), and intake of total energy, total sugar, coffee, starchy food, refined grains, snacks, pizza, and a modified AHEI score. HR, hazard ratio; CI, confidence interval; BMI, body mass index; CVD, cardiovascular disease; NSAIDs, Nonsteroidal anti-inflammatory drugs; AHEI, Alternative Healthy Eating Index.

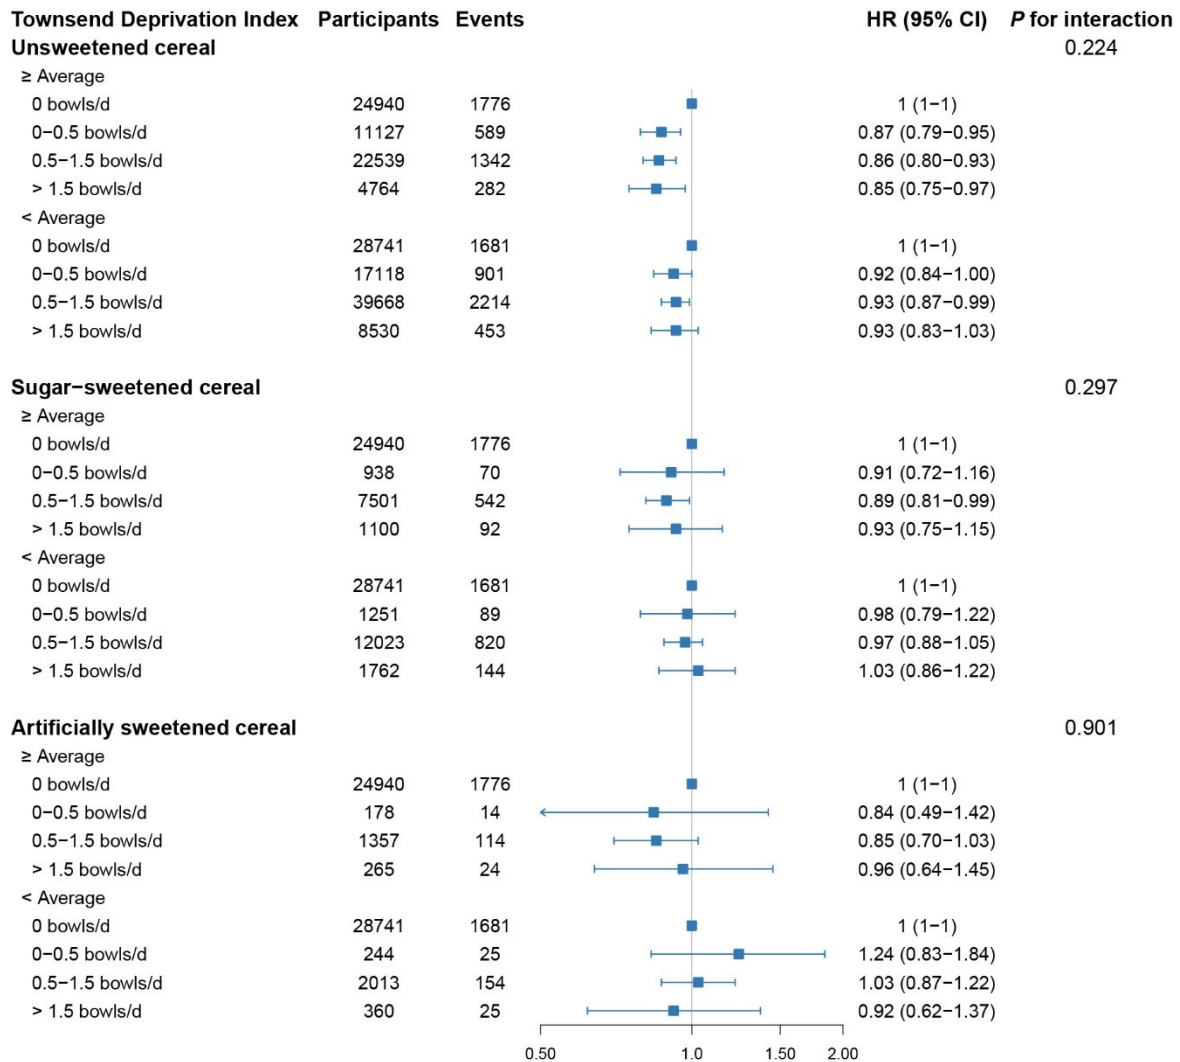

**Supplemental Figure 7. TDI-stratified analysis of the association between cereal consumption and all-cause mortality in the multivariable model.**

Note: The multivariable model was adjusted for age (continuous), sex (male or female), BMI ( $\geq 30$ ,  $\geq 25$  &  $< 30$ , or  $< 25$   $\text{kg/m}^2$ ), basal metabolic rate (continuous), ethnicity (White or other), household income ( $> 100000$ ,  $52000$ - $100000$ ,  $31000$ - $51999$ ,  $18000$ - $30999$ , or  $< 18,000$  £), education (degree or no degree), smoking status (never, former, or current), pack-years of smoking (continuous), physical activity level (low, moderate, or high), vitamin use (yes or no), mineral and other dietary supplements use (yes or no), NSAIDs use (yes or no), healthy sleep pattern (yes or no), family history of CVD (yes or no), family history of cancer (yes or no), number of long-term conditions (none, one, two, three, four or five and more), and intake of total energy, total sugar, coffee, starchy food, refined grains, snacks, pizza, and a modified AHEI score. HR, hazard ratio; CI, confidence interval; BMI, body mass index; CVD, cardiovascular disease; NSAIDs, Nonsteroidal anti-inflammatory drugs; AHEI, Alternative Healthy Eating Index.

### Unsweetened cereal

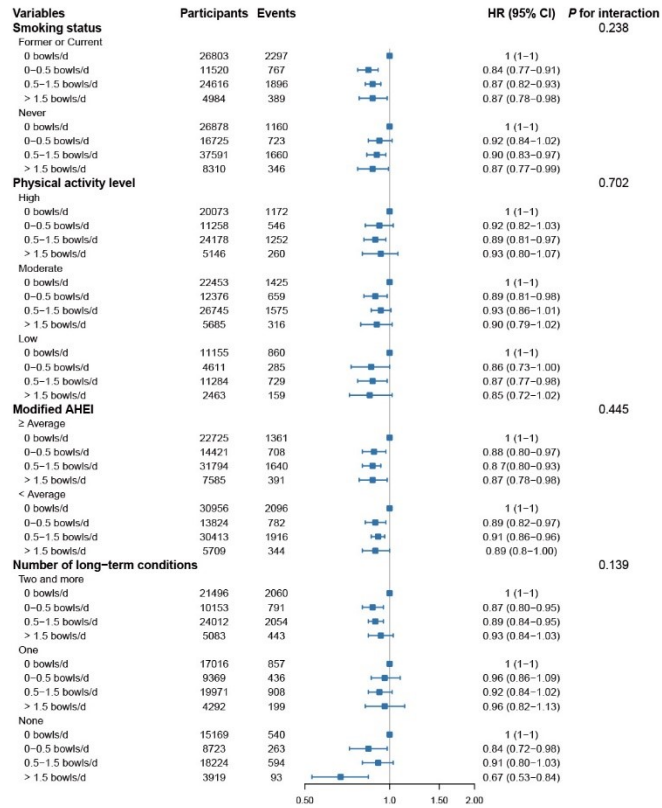

### Sugar-sweetened cereal

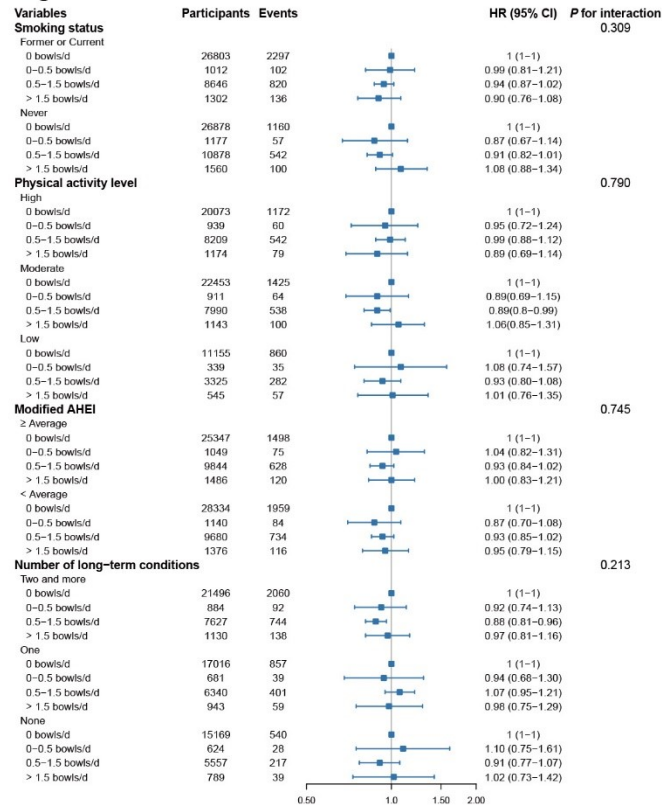

### Artificially sweetened cereal

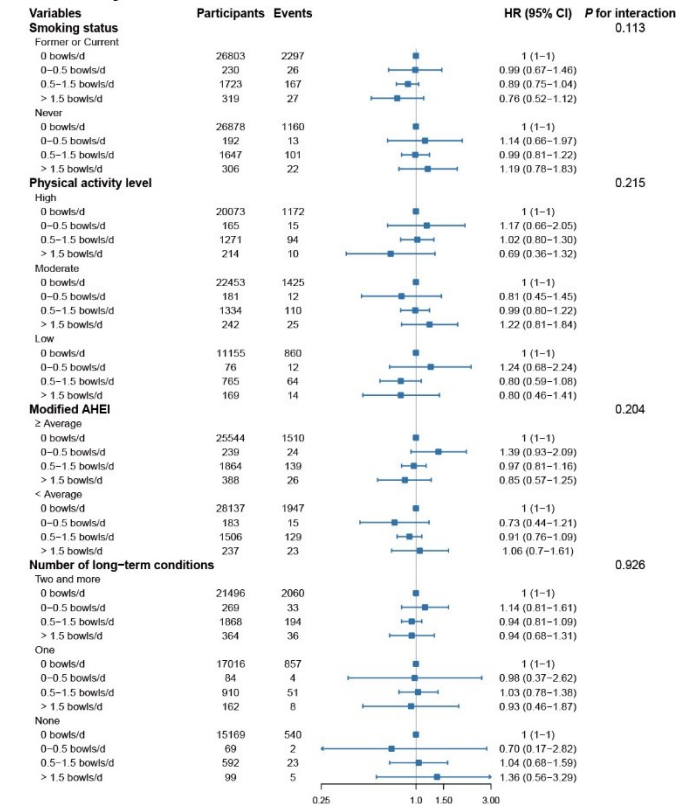

**Supplemental Figure 8. Associations of cereal consumption with all-cause mortality by subgroups.**

Note: The estimated effects are based on fully adjusted models except for the corresponding subgroup covariates. HR, hazard ratio; CI, confidence interval; AHEI, Alternative Healthy Eating Index.

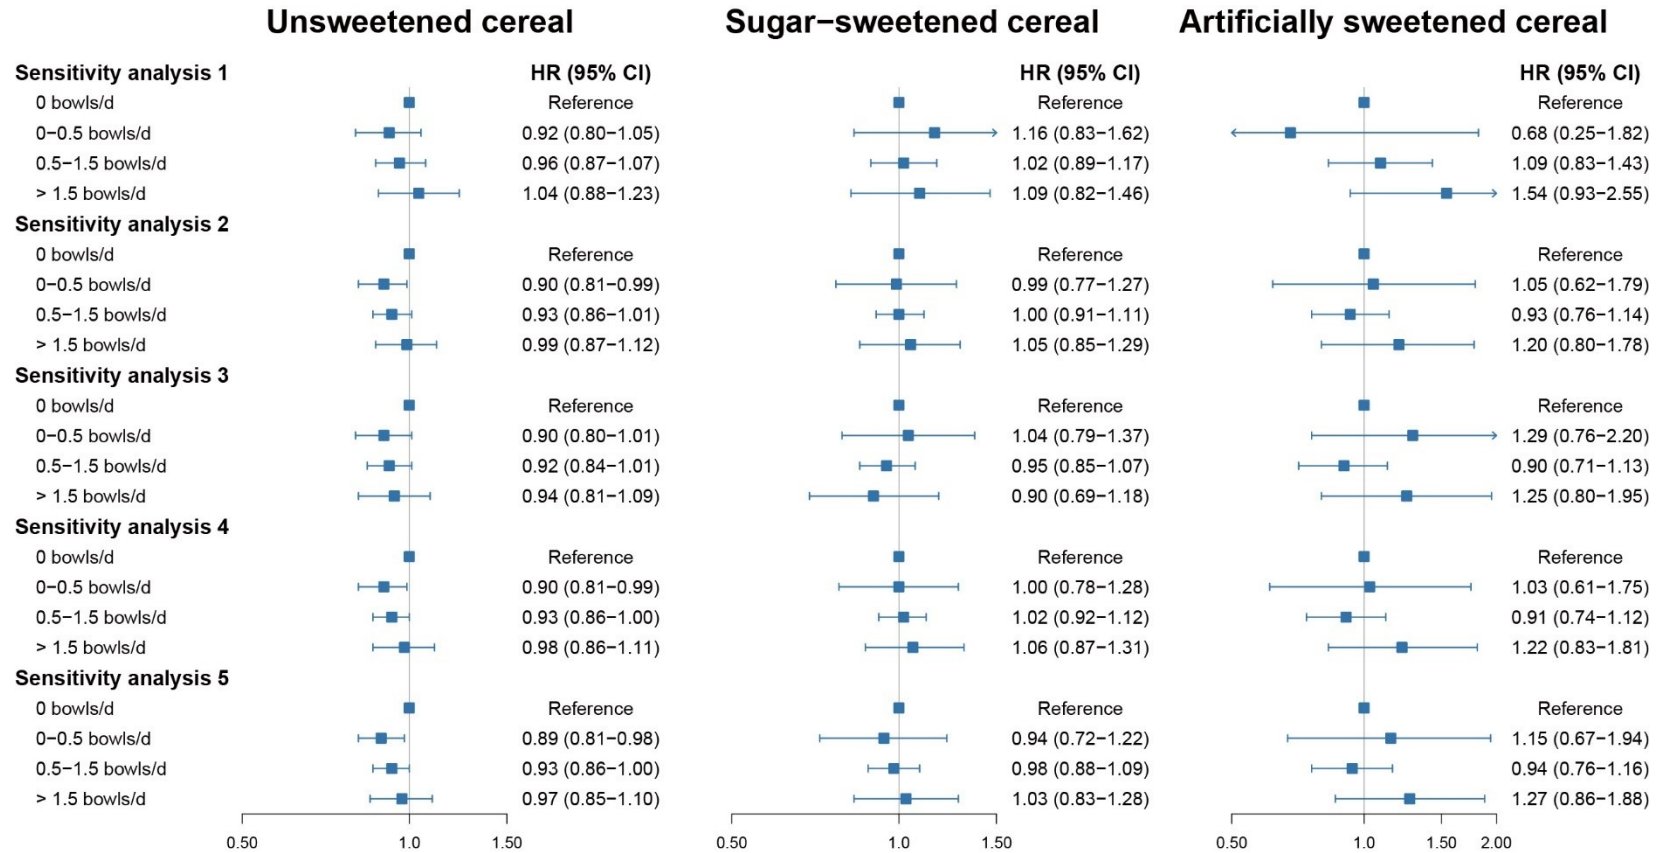

**Supplemental Figure 9. Sensitivity analysis of the association of cereal consumption with cancer-specific mortality.**

Note: Sensitivity analysis 1 excluded participants with missing values in covariates; sensitivity analysis 2 excluded participants who had an outcome event within the first 2 years of follow-up; sensitivity analysis 3 excluded participants who reported having an unusual cereal consumption day; sensitivity analysis 4 remove the sugar added to the cereal from the total sugar, and the energy produced is also removed from the total energy; sensitivity analysis 5 excluded participants who reported cereal consumption in the baseline questionnaire but were classified as non-consumers by the 24-hour dietary recall. All models were fully adjusted. HR: hazard ratio; CI: confidence interval.

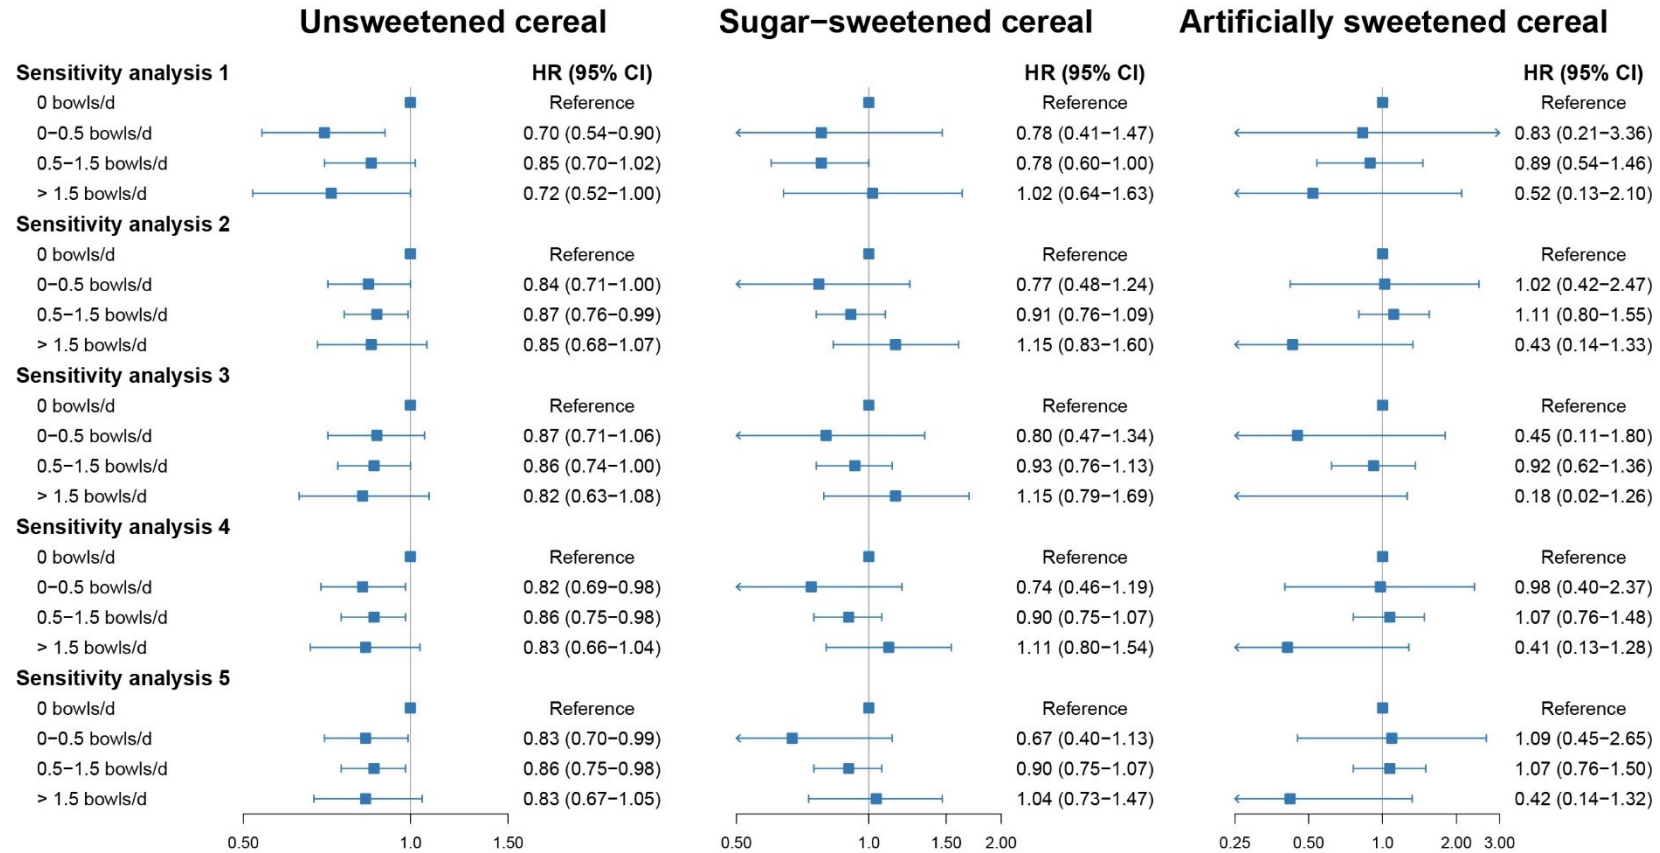

**Supplemental Figure 10. Sensitivity analysis of the association of cereal consumption with CVD-specific mortality.**

Note: Sensitivity analysis 1 excluded participants with missing values in covariates; sensitivity analysis 2 excluded participants who had an outcome event within the first 2 years of follow-up; sensitivity analysis 3 excluded participants who reported having an unusual cereal consumption day; sensitivity analysis 4 remove the sugar added to the cereal from the total sugar, and the energy produced is also removed from the total energy; sensitivity analysis 5 excluded participants who reported cereal consumption in the baseline questionnaire but were classified as non-consumers by the 24-hour dietary recall. All models were fully adjusted. HR: hazard ratio; CI: confidence interval; CVD: cardiovascular disease.

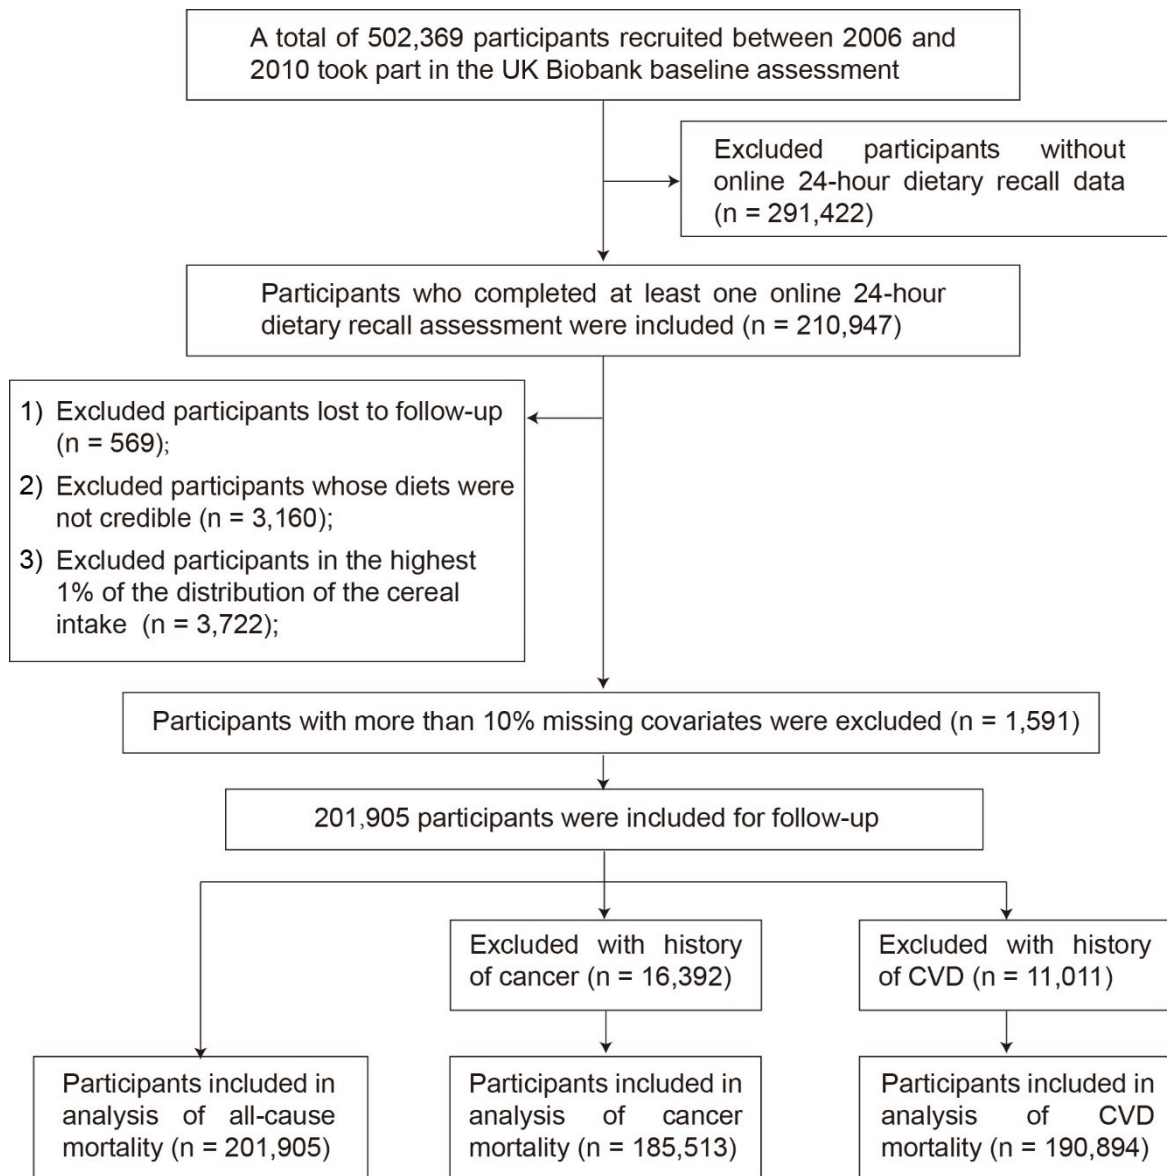

**Supplemental Figure 11. Flowchart of breakfast cereal consumption and all-cause, special-cause deaths.**

CVD: cardiovascular disease.

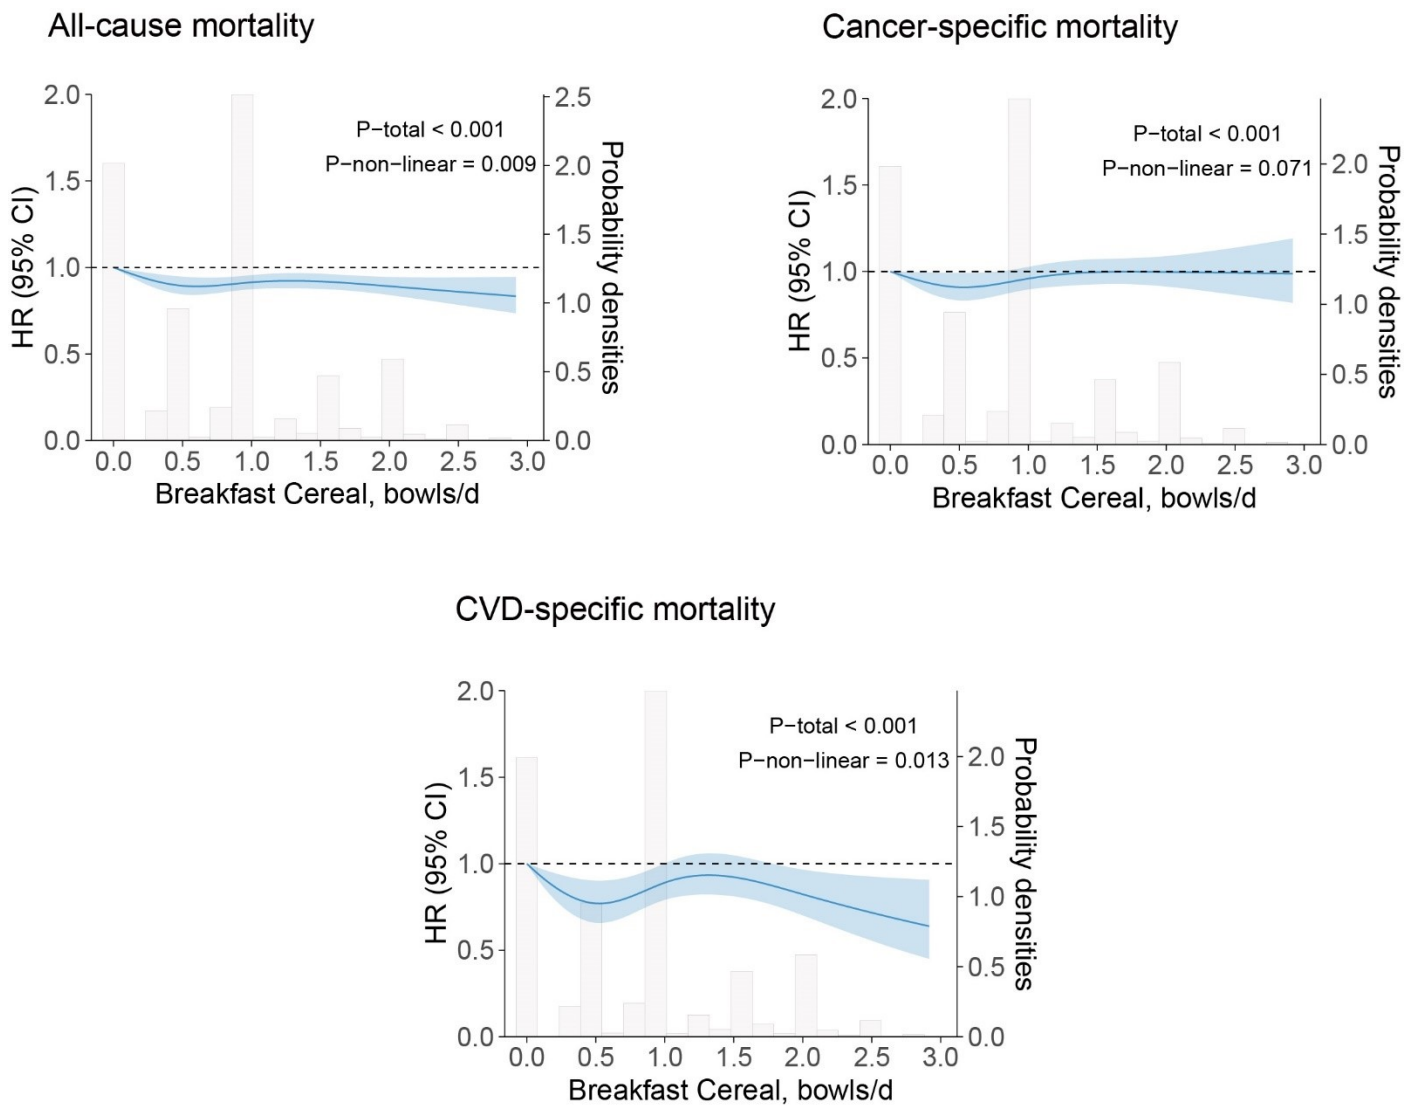

**Supplemental Figure 12. Dose–response associations of Breakfast cereal consumption with all-cause, cancer, and CVD mortality.**

Note: The multivariable model was adjusted for age (continuous), sex (male or female), BMI ( $\geq 30$ ,  $\geq 25$  &  $< 30$ , or  $< 25$   $\text{kg}/\text{m}^2$ ), basal metabolic rate (continuous), ethnicity (White or other), Townsend deprivation index (continuous), household income ( $> 100000$ , 52000-100000, 31000–51999, 18000-30999, or  $< 18,000$  £), education (degree or no degree), smoking status (never, former, or current), pack-years of smoking (continuous), physical activity level (low, moderate, or high), vitamin use (yes or no), mineral and other dietary supplements use (yes or no), NSAIDs use (yes or no), healthy sleep pattern (yes or no), family history of CVD (yes or no), family history of cancer (yes or no), number of long-term conditions (none, one, two, three, four or five and more), and intake of total energy, total sugar, coffee, starchy food, refined grains, snacks, pizza, and a modified AHEI-2010 score.

HR, hazard ratio; CI, confidence interval; BMI, body mass index; CVD, cardiovascular disease; NSAIDs, Nonsteroidal anti-inflammatory drugs; AHEI, Alternative Healthy Eating Index.
